# Supplementary material
Source: PubMed Central journal article supplement (PMC3128301)
Supplement: Supp_Data.pdf [file Supp_Data.pdf]

**SUPPLEMENTARY FILE 1.** Metabolite-Transcript pairs with significant Pearson correlation levels [ $\text{abs}(r) > 0.8$ ] under heat and cold stress conditions when metabolites were considered leading, that is, metabolite levels at time point  $t_i$  were correlated with transcript levels at time point  $t_{i+1}$ .

**SUPPLEMENTARY FILE 2.** Granger causality associations between all metabolites and cognate transcripts (encoding an enzyme for which the metabolite is either a substrate or a product) according to known metabolic pathways reported separately for heat and cold stress conditions and with both directions for a given metabolite-transcript pair.
