# Supplementary material
Source: PubMed Central journal article supplement (PMC3128301)
Supplement: Supp_File1.pdf [file Supp_File1.pdf]

**Cold Stress**

| <b>Metabolite</b>    | <b>Affy Probe ID</b> | <b>correlation</b> | <b>EC</b> | <b>Yeast Gene ID</b> | <b>Gene Symbol</b> | <b>Annotation</b>                                                                                                                              |
|----------------------|----------------------|--------------------|-----------|----------------------|--------------------|------------------------------------------------------------------------------------------------------------------------------------------------|
| Arginine             | 1774813_at           | 0.830492823        | 6.1.1.19  | YHR091C              | MSR1               | Nuclear-encoded mitochondrial protein                                                                                                          |
| Citric acid          | 1769943_at           | -0.829813097       | 4.2.1.3   | YJL200C              | ECM25              | Hypothetical ORF                                                                                                                               |
| Fructose             | 1770167_at           | 0.983643136        | 2.7.1.1   | YGL253W              | HXK2               | Hexokinase isoenzyme 2                                                                                                                         |
| Fructose             | 1770506_at           | 0.942699545        | 3.2.1.26  | YIL162W              | SUC2               | Suc2p                                                                                                                                          |
| Fructose             | 1775391_s_at         | 0.908667563        | 3.2.1.20  | YIL172C              | VTH1               | Hypothetical ORF                                                                                                                               |
| Fructose             | 1778617_at           | 0.944075395        | 3.2.1.20  | YJL216C              | HXT9               | Protein of unknown function                                                                                                                    |
| Fructose-6-phosphate | 1770167_at           | 0.976879131        | 2.7.1.1   | YGL253W              | HXK2               | Hexokinase isoenzyme 2                                                                                                                         |
| Fructose-6-phosphate | 1774340_at           | 0.867796391        | 3.1.3.46  | YJL155C              | FBP26              | Fructose-2                                                                                                                                     |
| Fructose-6-phosphate | 1774445_at           | 0.881481431        | 2.7.1.11  | YGR240C              | PFK1               | phosphofructokinase alpha subunit                                                                                                              |
| Fructose-6-phosphate | 1776768_at           | 0.957430871        | 3.1.3.11  | YLR377C              | FBP1               | Fructose-1                                                                                                                                     |
| Fumaric acid         | 1779688_at           | -0.873349669       | 1.3.5.1   | YLR164W              | MAS1               | YLR164Wp is homologous to TIM18p                                                                                                               |
|                      |                      |                    |           |                      |                    | Non-essential protein of unknown function<br>required for transcriptional induction of the<br>early meiotic-specific transcription factor IME1 |
| Glucose              | 1770001_at           | 0.918002771        | 2.7.1.2   | YDR516C              | EMI2               |                                                                                                                                                |
| Glucose              | 1770167_at           | 0.96378365         | 2.7.1.1   | YGL253W              | HXK2               | Hexokinase isoenzyme 2                                                                                                                         |
| Glucose              | 1775391_s_at         | 0.948887214        | 3.2.1.20  | YIL172C              | VTH1               | Hypothetical ORF                                                                                                                               |
| Glucose              | 1775738_at           | 0.827385156        | 3.2.1.22  | YBR184W              | YPC1               | Hypothetical ORF                                                                                                                               |
| Glucose              | 1778617_at           | 0.964795956        | 3.2.1.20  | YJL216C              | HXT9               | Protein of unknown function                                                                                                                    |
|                      |                      |                    |           |                      |                    | Non-essential protein of unknown function<br>required for transcriptional induction of the<br>early meiotic-specific transcription factor IME1 |
| Glucose-6-phosphate  | 1770001_at           | 0.923989404        | 2.7.1.2   | YDR516C              | EMI2               | 115 kD regulatory subunit of trehalose-6-                                                                                                      |
| Glucose-6-phosphate  | 1773683_at           | 0.909520111        | 2.4.1.15  | YMR261C              | TPS3               | phosphate synthase<br>123 kD regulatory subunit of trehalose-6-                                                                                |
| Glucose-6-phosphate  | 1774756_at           | 0.919204856        | 2.4.1.15  | YML100W              | TSL1               | phosphate synthase                                                                                                                             |
| Glucose-6-phosphate  | 1775976_at           | 0.8829882          | 2.7.1.1   | YFR053C              | HXK1               | Hexokinase isoenzyme 1                                                                                                                         |
| Glucose-6-phosphate  | 1776427_at           | 0.940897388        | 1.1.1.49  | YNL241C              | ZWF1               | Glucose-6-phosphate dehydrogenase                                                                                                              |
| Glucose-6-phosphate  | 1779150_at           | 0.909031401        | 2.7.1.2   | YCL040W              | GLK1               | Glucose phosphorylation<br>Probable regulator of glucose influx into the cell                                                                  |
| Glucose-6-phosphate  | 1779408_at           | 0.889433862        | 2.4.1.15  | YBR126C              | TPS1               | & into glycolytic pathway<br>putative alanine transaminase (glutamyl pyruvic                                                                   |
| Glutamic acid        | 1769691_at           | 0.842801861        | 2.6.1.2   | YLR089C              | GAA1               | transaminase)<br>Acetylglutamate synthase (glutamate N-                                                                                        |
| Glutamic acid        | 1773952_at           | -0.899469259       | 2.3.1.35  | YJL071W              | ARG2               | acetyltransferase)                                                                                                                             |
| Glutamic acid        | 1774739_at           | -0.828322746       | 2.6.1.9   | YIL116W              | HIS5               | Histidinol-phosphate aminotransferase                                                                                                          |

|               |            |              |          |         |       |                                                                                                                                                                                                                   |
|---------------|------------|--------------|----------|---------|-------|-------------------------------------------------------------------------------------------------------------------------------------------------------------------------------------------------------------------|
| Glutamic acid | 1775518_at | -0.918376151 | 6.3.5.1  | YHR074W | QNS1  | Glutamine-dependent NAD Synthetase                                                                                                                                                                                |
| Glutamic acid | 1776080_at | 0.915883073  | 6.1.1.17 | YGL245W | RAI1  | Glutamyl-tRNA synthetase (GluRS)                                                                                                                                                                                  |
| Glutamic acid | 1776272_at | -0.855008611 | 2.3.1.35 | YMR062C | ECM40 | Mitochondrial ornithine acetyltransferase<br>putative alanine transaminase (glutamyl pyruvic<br>transaminase)                                                                                                     |
| Glutamic acid | 1778563_at | 0.876694182  | 2.6.1.2  | YDR111C | FOB1  | Multifunctional carbamoylphosphate synthetase<br>(CPSase)-aspartate transcarbamylase (ATCase)<br>that catalyzes the two first reactions of the<br>pyrimidine pathway<br>Utilizes NADP+ as the preferred coenzyme. |
| Glutamic acid | 1779682_at | -0.802185116 | 6.3.5.5  | YJL130C | URA2  | Activated by K+.                                                                                                                                                                                                  |
| Glyceric acid | 1771943_at | -0.959520478 | 1.2.1.3  | YER073W | ALD5  | Glucose repressed. Utilizes NADP+ or NAD+ as a<br>coenzyme equally well. (sold by SIGMA under<br>the catalogue number A5550                                                                                       |
| Glyceric acid | 1776624_at | 0.923020599  | 1.2.1.3  | YOR374W | ALD4  | Utilizes NADP+ as the preferred coenzyme.                                                                                                                                                                         |
| Glyceric acid | 1778325_at | 0.821755486  | 1.2.1.3  | YPL061W | ALD6  | Activated by Mg2+.                                                                                                                                                                                                |
| Isoleucine    | 1779000_at | -0.844282111 | 2.6.1.42 | YHR208W | BAT1  | BAT1 highly expressed during logarithmic phase<br>and is repressed during stationary phase                                                                                                                        |
| Lysine        | 1770279_at | -0.815146015 | 1.5.1.7  | YIR034C | LYS1  | saccharopine dehydrogenase                                                                                                                                                                                        |
| Lysine        | 1771061_at | 0.891393503  | 6.1.1.6  | YNL073W | MSK1  | mitochondrial lysine-tRNA synthetase                                                                                                                                                                              |
| Lysine        | 1779238_at | -0.878603734 | 6.1.1.6  | YDR037W | KRS1  | lysyl-tRNA synthetase                                                                                                                                                                                             |
| Malic acid    | 1769857_at | -0.945839494 | 1.1.1.37 | YKL085W | MDH1  | mitochondrial malate dehydrogenase                                                                                                                                                                                |
| Malic acid    | 1770087_at | 0.874182769  | 4.2.1.2  | YPL262W | FUM1  | Fumarase                                                                                                                                                                                                          |
| Malic acid    | 1774081_at | -0.952654406 | 1.1.1.37 | YOL126C | MDH2  | cytosolic malate dehydrogenase                                                                                                                                                                                    |
| Proline       | 1778412_at | 0.850564806  | 1.5.1.2  | YER023W | PRO3  | Delta 1-pyrroline-5-carboxylate reductase                                                                                                                                                                         |
| Serine        | 1771458_at | 0.914220116  | 3.1.3.3  | YGR208W | SER2  | phosphoserine phosphatase                                                                                                                                                                                         |
| Serine        | 1774806_at | 0.87678734   | 2.1.2.1  | YBR263W | SHM1  | Serine hydroxymethyltransferase                                                                                                                                                                                   |
| Serine        | 1776401_at | 0.895707658  | 2.1.2.1  | YLR058C | SHM2  | serine hydroxymethyltransferase                                                                                                                                                                                   |
| Serine        | 1776603_at | 0.807343484  | 4.3.1.19 | YER086W | ILV1  | Threonine deaminase                                                                                                                                                                                               |
| Serine        | 1776877_at | 0.951394922  | 6.1.1.11 | YDR023W | SES1  | seryl-tRNA synthetase                                                                                                                                                                                             |
| Serine        | 1778479_at | 0.924259607  | 4.3.1.19 | YCL064C | CHA1  | catabolism of hydroxy amino acids                                                                                                                                                                                 |
| Trehalose     | 1776531_at | -0.828380305 | 3.1.3.12 | YDR074W | TPS2  | Trehalose-6-phosphate phosphatase                                                                                                                                                                                 |

## Heat Stress

| Metabolite                | Affy Probe ID | correlation    |          | Yeast Gene |             | Annotation                                                                                                                               |
|---------------------------|---------------|----------------|----------|------------|-------------|------------------------------------------------------------------------------------------------------------------------------------------|
|                           |               | coefficient, r | EC       | ID         | Gene Symbol |                                                                                                                                          |
| Adenosine-5-monophosphate | 1771215_at    | 0.937044153    | 3.1.3.7  | YOL064C    | MET22       | Bisphosphate-3'-nucleotidase                                                                                                             |
| Adenosine-5-monophosphate | 1776097_at    | 0.83462906     | 2.7.6.1  | YHL011C    | PRS3        | 5-phospho-ribosyl-1(alpha)-pyrophosphate synthetase                                                                                      |
| Adenosine-5-monophosphate | 1778594_at    | 0.8087759      | 3.1.4.17 | YOR360C    | PDE2        | low-Km (high-affinity) cAMP phosphodiesterase                                                                                            |
| Alanine                   | 1776171_at    | 0.899683824    | 6.1.1.7  | YOR335C    | ALA1        | Cytoplasmic alanyl-tRNA synthetase                                                                                                       |
| Alanine                   | 1778563_at    | -0.874481904   | 2.6.1.2  | YDR111C    | FOB1        | putative alanine transaminase (glutamyl pyruvic transaminase)                                                                            |
| Arginine                  | 1774813_at    | 0.830492823    | 6.1.1.19 | YHR091C    | MSR1        | Nuclear-encoded mitochondrial protein                                                                                                    |
| Asparagine                | 1777566_s_at  | 0.805893491    | 3.5.1.1  | YLR155C    | ASP3-1      | Cell-wall L-asparaginase II                                                                                                              |
| Citric acid               | 1769943_at    | -0.829813097   | 4.2.1.3  | YJL200C    | ECM25       | Hypothetical ORF                                                                                                                         |
| Fructose                  | 1770167_at    | 0.983643136    | 2.7.1.1  | YGL253W    | HXK2        | Hexokinase isoenzyme 2                                                                                                                   |
| Fructose                  | 1770506_at    | 0.942699545    | 3.2.1.26 | YIL162W    | SUC2        | Suc2p                                                                                                                                    |
| Fructose                  | 1775391_s_at  | 0.908667563    | 3.2.1.20 | YIL172C    | VTH1        | Hypothetical ORF                                                                                                                         |
| Fructose                  | 1778617_at    | 0.944075395    | 3.2.1.20 | YJL216C    | HXT9        | Protein of unknown function                                                                                                              |
| Fructose-6-phosphate      | 1770167_at    | 0.976879131    | 2.7.1.1  | YGL253W    | HXK2        | Hexokinase isoenzyme 2                                                                                                                   |
| Fructose-6-phosphate      | 1774340_at    | 0.867796391    | 3.1.3.46 | YJL155C    | FBP26       | Fructose-2                                                                                                                               |
| Fructose-6-phosphate      | 1774445_at    | 0.881481431    | 2.7.1.11 | YGR240C    | PFK1        | phosphofructokinase alpha subunit                                                                                                        |
| Fructose-6-phosphate      | 1776768_at    | 0.957430871    | 3.1.3.11 | YLR377C    | FBP1        | Fructose-1                                                                                                                               |
| Fumaric acid              | 1779688_at    | -0.873349669   | 1.3.5.1  | YLR164W    | MAS1        | YLR164Wp is homologous to TIM18p                                                                                                         |
| Glucose                   | 1775738_at    | 0.823555683    | 3.2.1.22 | YBR184W    | YPC1        | Hypothetical ORF                                                                                                                         |
| Glucose                   | 1770001_at    | 0.918002771    | 2.7.1.2  | YDR516C    | EMI2        | Non-essential protein of unknown function required for transcriptional induction of the early meiotic-specific transcription factor IME1 |
| Glucose                   | 1770167_at    | 0.96378365     | 2.7.1.1  | YGL253W    | HXK2        | Hexokinase isoenzyme 2                                                                                                                   |
| Glucose                   | 1775391_s_at  | 0.948887214    | 3.2.1.20 | YIL172C    | VTH1        | Hypothetical ORF                                                                                                                         |
| Glucose                   | 1775738_at    | 0.827385156    | 3.2.1.22 | YBR184W    | YPC1        | Hypothetical ORF                                                                                                                         |
| Glucose                   | 1778617_at    | 0.964795956    | 3.2.1.20 | YJL216C    | HXT9        | Protein of unknown function                                                                                                              |
| Glucose-6-phosphate       | 1770001_at    | 0.923989404    | 2.7.1.2  | YDR516C    | EMI2        | Non-essential protein of unknown function required for transcriptional induction of the early meiotic-specific transcription factor IME1 |
| Glucose-6-phosphate       | 1773683_at    | 0.909520111    | 2.4.1.15 | YMR261C    | TPS3        | 115 kD regulatory subunit of trehalose-6-phosphate synthase                                                                              |
| Glucose-6-phosphate       | 1774756_at    | 0.919204856    | 2.4.1.15 | YML100W    | TSL1        | 123 kD regulatory subunit of trehalose-6-phosphate synthase                                                                              |
| Glucose-6-phosphate       | 1775976_at    | 0.8829882      | 2.7.1.1  | YFR053C    | HXK1        | Hexokinase isoenzyme 1                                                                                                                   |
| Glucose-6-phosphate       | 1776427_at    | 0.940897388    | 1.1.1.49 | YNL241C    | ZWF1        | Glucose-6-phosphate dehydrogenase                                                                                                        |
| Glucose-6-phosphate       | 1779150_at    | 0.909031401    | 2.7.1.2  | YCL040W    | GLK1        | Glucose phosphorylation                                                                                                                  |

|                     |            |              |          |         |       |                                                                                                                        |
|---------------------|------------|--------------|----------|---------|-------|------------------------------------------------------------------------------------------------------------------------|
| Glucose-6-phosphate | 1779408_at | 0.889433862  | 2.4.1.15 | YBR126C | TPS1  | Probable regulator of glucose influx into the cell & into glycolytic pathway                                           |
| Glutamic acid       | 1769938_at | 0.882082785  | 6.3.2.17 | YKL132C | RMA1  | probable folyl-polyglutamate synthetase                                                                                |
| Glutamic acid       | 1772615_at | 0.854638933  | 6.3.5.4  | YPR145W | ASN1  | Asparagine synthetase                                                                                                  |
| Glutamic acid       | 1773117_at | -0.882215795 | 1.5.1.12 | YHR037W | PUT2  | delta-1-pyrroline-5-carboxylate dehydrogenase                                                                          |
| Glutamic acid       | 1773540_at | 0.867634604  | 2.7.2.11 | YDR300C | PRO1  | Gamma-glutamyl kinase                                                                                                  |
| Glutamic acid       | 1775174_at | -0.813191195 | 6.3.2.17 | YMR113W | FOL3  | Dihydrofolate synthetase                                                                                               |
| Glutamic acid       | 1776650_at | 0.846207249  | 2.6.1.1  | YKL106W | AAT1  | Mitochondrial aspartate aminotransferase                                                                               |
| Glutamic acid       | 1777344_at | -0.845307957 | 2.6.1.42 | YJR148W | BAT2  | BAT1 highly expressed during logarithmic phase and is repressed during stationary phase                                |
| Glutamic acid       | 1778563_at | -0.85141935  | 2.6.1.2  | YDR111C | FOB1  | putative alanine transaminase (glutamyl pyruvic transaminase)                                                          |
| Glutamic acid       | 1779000_at | 0.920530026  | 2.6.1.42 | YHR208W | BAT1  | BAT1 highly expressed during logarithmic phase and is repressed during stationary phase                                |
| Glutamic acid       | 1779734_at | 0.815487462  | 6.3.5.2  | YMR217W | GUA1  | GMP synthase                                                                                                           |
| Glutamic acid       | 1769691_at | 0.842801861  | 2.6.1.2  | YLR089C | GAA1  | putative alanine transaminase (glutamyl pyruvic transaminase)                                                          |
| Glutamic acid       | 1773952_at | -0.899469259 | 2.3.1.35 | YJL071W | ARG2  | Acetylglutamate synthase (glutamyl N-acetyltransferase)                                                                |
| Glutamic acid       | 1774739_at | -0.828322746 | 2.6.1.9  | YIL116W | HIS5  | Histidinol-phosphate aminotransferase                                                                                  |
| Glutamic acid       | 1775518_at | -0.918376151 | 6.3.5.1  | YHR074W | QNS1  | Glutamine-dependent NAD Synthetase                                                                                     |
| Glutamic acid       | 1776080_at | 0.915883073  | 6.1.1.17 | YGL245W | RAI1  | Glutamyl-tRNA synthetase (GluRS)                                                                                       |
| Glutamic acid       | 1776272_at | -0.855008611 | 2.3.1.35 | YMR062C | ECM40 | Mitochondrial ornithine acetyltransferase                                                                              |
| Glutamic acid       | 1778563_at | 0.876694182  | 2.6.1.2  | YDR111C | FOB1  | putative alanine transaminase (glutamyl pyruvic transaminase)                                                          |
| Glutamic acid       | 1779682_at | -0.802185116 | 6.3.5.5  | YJL130C | URA2  | Multifunctional carbamoylphosphate synthetase (CPSase)-                                                                |
| Glutamine           | 1772615_at | 0.873616227  | 6.3.5.4  | YPR145W | ASN1  | aspartate transcarbamylase (ATCase) that catalyzes the two first reactions of the pyrimidine pathway                   |
| Glyceric acid       | 1771943_at | -0.959520478 | 1.2.1.3  | YER073W | ALD5  | Asparagine synthetase                                                                                                  |
| Glyceric acid       | 1776624_at | 0.923020599  | 1.2.1.3  | YOR374W | ALD4  | Utilizes NADP+ as the preferred coenzyme. Activated by K+.                                                             |
| Glyceric acid       | 1778325_at | 0.821755486  | 1.2.1.3  | YPL061W | ALD6  | Glucose repressed. Utilizes NADP+ or NAD+ as a coenzyme equally well. (sold by SIGMA under the catalogue number A5550) |
| Homoserine          | 1777312_at | 0.915289263  | 2.7.1.39 | YHR025W | THR1  | Utilizes NADP+ as the preferred coenzyme. Activated by Mg2+.                                                           |
| Isoleucine          | 1777344_at | -0.916418773 | 2.6.1.42 | YJR148W | BAT2  | homoserine kinase                                                                                                      |
| Isoleucine          | 1779139_at | 0.936411589  | 6.1.1.5  | YBL076C | ILS1  | BAT1 highly expressed during logarithmic phase and is repressed during stationary phase                                |
|                     |            |              |          |         |       | Cytoplasmic isoleucine-tRNA synthetase                                                                                 |

|               |            |              |          |         |       |                                                                                             |
|---------------|------------|--------------|----------|---------|-------|---------------------------------------------------------------------------------------------|
| Isoleucine    | 1779000_at | -0.844282111 | 2.6.1.42 | YHR208W | BAT1  | BAT1 highly expressed during logarithmic phase and is repressed during stationary phase     |
| Lysine        | 1770279_at | -0.815146015 | 1.5.1.7  | YIR034C | LYS1  | saccharopine dehydrogenase                                                                  |
| Lysine        | 1771061_at | 0.891393503  | 6.1.1.6  | YNL073W | MSK1  | mitochondrial lysine-tRNA synthetase                                                        |
| Lysine        | 1779238_at | -0.878603734 | 6.1.1.6  | YDR037W | KRS1  | lysyl-tRNA synthetase                                                                       |
| Malic acid    | 1769857_at | -0.945839494 | 1.1.1.37 | YKL085W | MDH1  | mitochondrial malate dehydrogenase                                                          |
| Malic acid    | 1770087_at | 0.874182769  | 4.2.1.2  | YPL262W | FUM1  | Fumarase                                                                                    |
| Malic acid    | 1774081_at | -0.952654406 | 1.1.1.37 | YOL126C | MDH2  | cytosolic malate dehydrogenase                                                              |
| Phenylalanine | 1773228_at | -0.98286093  | 6.1.1.20 | YPR047W | MSF1  | alpha subunit of yeast mitochondrial phenylalanyl-tRNA synthetase                           |
| Phenylalanine | 1776650_at | 0.894019205  | 2.6.1.1  | YKL106W | AAT1  | Mitochondrial aspartate aminotransferase                                                    |
| Phenylalanine | 1779336_at | 0.869285556  | 6.1.1.20 | YFL022C | FRS2  | Beta (small) subunit of cytoplasmic phenylalanyl-tRNA synthetase                            |
| Proline       | 1774658_at | 0.955230036  | 6.1.1.15 | YHR020W | DED81 | Protein required for cell viability                                                         |
| Proline       | 1776689_at | -0.854809048 | 6.1.1.15 | YER087W | ILV1  | Hypothetical ORF                                                                            |
| Proline       | 1778412_at | -0.897808151 | 1.5.1.2  | YER023W | PRO3  | Delta 1-pyrroline-5-carboxylate reductase                                                   |
| Proline       | 1778412_at | 0.850564806  | 1.5.1.2  | YER023W | PRO3  | Delta 1-pyrroline-5-carboxylate reductase                                                   |
| Serine        | 1771458_at | 0.813592041  | 3.1.3.3  | YGR208W | SER2  | phosphoserine phosphatase                                                                   |
| Serine        | 1776603_at | 0.881509564  | 4.3.1.19 | YER086W | ILV1  | Threonine deaminase                                                                         |
| Serine        | 1776877_at | 0.807363439  | 6.1.1.11 | YDR023W | SES1  | seryl-tRNA synthetase                                                                       |
| Serine        | 1779478_at | 0.976823382  | 4.2.1.20 | YGL026C | TRP5  | tryptophan synthetase                                                                       |
| Serine        | 1771458_at | 0.914220116  | 3.1.3.3  | YGR208W | SER2  | phosphoserine phosphatase                                                                   |
| Serine        | 1774806_at | 0.87678734   | 2.1.2.1  | YBR263W | SHM1  | Serine hydroxymethyltransferase                                                             |
| Serine        | 1776401_at | 0.895707658  | 2.1.2.1  | YLR058C | SHM2  | serine hydroxymethyltransferase                                                             |
| Serine        | 1776603_at | 0.807343484  | 4.3.1.19 | YER086W | ILV1  | Threonine deaminase                                                                         |
| Serine        | 1776877_at | 0.951394922  | 6.1.1.11 | YDR023W | SES1  | seryl-tRNA synthetase                                                                       |
| Serine        | 1778479_at | 0.924259607  | 4.3.1.19 | YCL064C | CHA1  | catabolism of hydroxy amino acids                                                           |
| Threonine     | 1769828_at | -0.940356164 | 6.1.1.3  | YKL194C | MST1  | mitochondrial threonine-tRNA synthetase                                                     |
| Threonine     | 1772625_at | 0.806506445  | 4.1.2.5  | YEL046C | GLY1  | L-threonine aldolase that catalyzes cleavage of L-allo-threonine and L-threonine to glycine |
| Threonine     | 1774604_at | 0.801698067  | 6.1.1.3  | YIL078W | THS1  | Threonyl-tRNA synthetase                                                                    |
| Threonine     | 1776603_at | 0.926368306  | 4.3.1.19 | YER086W | ILV1  | Threonine deaminase                                                                         |
| Trehalose     | 1776531_at | -0.828380305 | 3.1.3.12 | YDR074W | TPS2  | Trehalose-6-phosphate phosphatase                                                           |
| Valine        | 1777344_at | -0.928940739 | 2.6.1.42 | YJR148W | BAT2  | BAT1 highly expressed during logarithmic phase and is repressed during stationary phase     |
| Valine        | 1779000_at | 0.92053668   | 2.6.1.42 | YHR208W | BAT1  | BAT1 highly expressed during logarithmic phase and is repressed during stationary phase     |
