# Supplementary material
Source: PubMed Central journal article supplement (PMC3128301)
Supplement: Supp_File2.pdf [file Supp_File2.pdf]

**Cold Stress**

| <b>Cause</b>          | <b>Effect</b>           | <b>F-test</b> | <b>p-value</b> | <b>Rank</b> | <b>BH-correct lag=1</b> |
|-----------------------|-------------------------|---------------|----------------|-------------|-------------------------|
| YKL106W_1776650_at.2  | -> Phenylalanine.3      | 104.7400252   | 0.001988715    | 1           | 0.452788                |
| YBR299W_1774491_s_at  | -> Fructose.3           | 75.104371     | 0.003232495    | 2           | 0.452788                |
| Arginine.1            | -> YDR341C_1773272_at   | 72.901451     | 0.003375402    | 3           | 0.452788                |
| YFL022C_1779336_at    | -> Phenylalanine.6      | 65.359512     | 0.00395448     | 4           | 0.452788                |
| Malic_acid.2          | -> YOL126C_1774081_at   | 39.7178416    | 0.008071696    | 5           | 0.604801                |
| YIL172C_1775391_s_at  | -> Fructose.4           | 39.165737     | 0.008233149    | 6           | 0.604801                |
| YLR060W_1777242_at    | -> Phenylalanine.5      | 30.560871     | 0.01166246     | 7           | 0.604801                |
| Glutamic_acid.22      | -> YHR074W_1775518_at   | 29.5560373    | 0.01221742     | 8           | 0.604801                |
| YJL200C_1769943_at    | -> Citric_acid          | 28.38416      | 0.01292245     | 9           | 0.604801                |
| Fructose              | -> YGL253W_1770167_at   | 27.94354582   | 0.01320526     | 10          | 0.604801                |
| Trehalose.2           | -> YDR074W_1776531_at   | 23.710019     | 0.01654894     | 11          | 0.617064                |
| Serine.1              | -> YDR062W_1770116_at   | 23.0513872    | 0.01719654     | 12          | 0.617064                |
| YPR047W_1773228_at    | -> Phenylalanine        | 20.346041     | 0.0203605      | 13          | 0.617064                |
| Malic_acid.4          | -> YDL078C_1778808_at   | 19.9380352    | 0.0209221      | 14          | 0.617064                |
| Fructose.6.phosphate  | -> YGL253W_1770167_at.2 | 19.697694     | 0.02126512     | 15          | 0.617064                |
| YNL316C_1777156_at    | -> Phenylalanine.4      | 14.573911     | 0.03162512     | 16          | 0.617064                |
| Trehalose.3           | -> YPR026W_1777053_at.1 | 1.39E+01      | 0.03373892     | 17          | 0.617064                |
| YPR026W_1777053_at.1  | -> Trehalose.3          | 13.79574      | 0.0339414      | 18          | 0.617064                |
| Glucose.6             | -> YBR184W_1775738_at.1 | 13.7907825    | 0.03395704     | 19          | 0.617064                |
| Glutamic_acid.12      | -> YJL071W_1773952_at   | 13.7011098    | 0.03424235     | 20          | 0.617064                |
| Glutamic_acid.29      | -> YJR109C_1777097_at   | 13.5209206    | 0.03482792     | 21          | 0.617064                |
| Malic_acid            | -> YKL085W_1769857_at   | 13.19581523   | 0.03592768     | 22          | 0.617064                |
| Glutamic_acid         | -> YGR124W_1769642_at.1 | 12.992491     | 0.03664531     | 23          | 0.617064                |
| Serine.10             | -> YCL064C_1778479_at   | 12.956913     | 0.03677335     | 24          | 0.617064                |
| Serine.9              | -> YDR023W_1776877_at   | 12.1696845    | 0.03980971     | 25          | 0.617064                |
| YLR304C_1778035_at    | -> Citric_acid.2        | 11.473388     | 0.04286196     | 26          | 0.617064                |
| Glucose.6.phosphate.3 | -> YML100W_1774756_at   | 11.352372     | 0.04343241     | 27          | 0.617064                |
| Glucose.1             | -> YGL253W_1770167_at.1 | 11.2385796    | 0.04398048     | 28          | 0.617064                |
| YLR089C_1769691_at    | -> Alanine              | 10.426475     | 0.04825233     | 29          | 0.617064                |
| Glucose.8             | -> YBR001C_1776046_at   | 10.27723044   | 0.04911311     | 30          | 0.617064                |
| YPL111W_1778654_at    | -> Arginine.3           | 10.251635     | 0.04926331     | 31          | 0.617064                |

|                       |                           |             |            |    |          |
|-----------------------|---------------------------|-------------|------------|----|----------|
| Fumaric_acid.11       | -> YLR164W_1779688_at.1   | 10.2275958  | 0.04940508 | 32 | 0.617064 |
| Glucose.6.phosphate.5 | -> YNL241C_1776427_at     | 9.958420659 | 0.05104033 | 33 | 0.617064 |
| Glucose.5             | -> YIL172C_1775391_s_at.1 | 9.817703    | 0.05193158 | 34 | 0.617064 |
| Glucose.6.phosphate.7 | -> YCL040W_1779150_at.1   | 9.6112639   | 0.05328706 | 35 | 0.617064 |
| YPR145W_1772615_at.2  | -> Asparagine.1           | 9.2034666   | 0.05614536 | 36 | 0.617064 |
| Glyceric_acid.1       | -> YOR374W_1776624_at     | 9.1785818   | 0.05632806 | 37 | 0.617064 |
| Ribose.5.phosphate.4  | -> YHL011C_1776097_at     | 9.095969    | 0.05694178 | 38 | 0.617064 |
| Glucose               | -> YDR516C_1770001_at     | 9.0462539   | 0.05731651 | 39 | 0.617064 |
| Glutamic_acid.37      | -> YMR217W_1779734_at     | 8.6238438   | 0.06067453 | 40 | 0.617064 |
| Alanine.1             | -> YFL030W_1770767_at.1   | 8.304259    | 0.06344035 | 41 | 0.617064 |
| Serine.4              | -> YBR263W_1774806_at     | 8.2627316   | 0.06381525 | 42 | 0.617064 |
| YDR074W_1776531_at    | -> Trehalose.2            | 8.153038    | 0.06482357 | 43 | 0.617064 |
| Glucose.6.phosphate.9 | -> YBR196C_1779775_at.1   | 8.1487923   | 0.06486313 | 44 | 0.617064 |
| Glucose.6.phosphate   | -> YDR516C_1770001_at.1   | 8.0582902   | 0.06571617 | 45 | 0.617064 |
| YMR318C_1770754_at    | -> Glycerol.1             | 7.9118969   | 0.06713644 | 46 | 0.617064 |
| YGL205W_1776791_at    | -> Citric_acid.1          | 7.87933954  | 0.0674593  | 47 | 0.617064 |
| YFR053C_1775976_at    | -> Fructose.5             | 7.748992    | 0.06877836 | 48 | 0.617064 |
| Glucose.6.phosphate.4 | -> YFR053C_1775976_at.3   | 7.6377466   | 0.06993867 | 49 | 0.617064 |
| YJL153C_1779129_at    | -> Glucose.6.phosphate.6  | 7.46E+00    | 0.07180914 | 50 | 0.617064 |
| Trehalose.1           | -> YBR001C_1776046_at.1   | 7.296211    | 0.07371423 | 51 | 0.617064 |
| YJR051W_1778330_at.1  | -> Fumaric_acid.10        | 7.1183657   | 0.07581779 | 52 | 0.617064 |
| YIL116W_1774739_at.1  | -> Phenylalanine.2        | 7.095009    | 0.07610153 | 53 | 0.617064 |
| Glucose.9             | -> YPR026W_1777053_at     | 7.0422766   | 0.07674872 | 54 | 0.617064 |
| Fumaric_acid.9        | -> YLR359W_1777563_at     | 7.0216327   | 0.07700461 | 55 | 0.617064 |
| Lysine                | -> YIR034C_1770279_at     | 6.899668    | 0.07854604 | 56 | 0.617064 |
| YGR124W_1769642_at    | -> Aspartic_acid          | 6.87245632  | 0.07889702 | 57 | 0.617064 |
| Ribose.5.phosphate.2  | -> YBL068W_1770750_at     | 6.697546    | 0.0812173  | 58 | 0.617064 |
| YAL062W_1772549_at    | -> Glutamic_acid.6        | 6.4434179   | 0.08479895 | 59 | 0.617064 |
| Proline.3             | -> YER023W_1778412_at     | 6.4323003   | 0.08496168 | 60 | 0.617064 |
| Ribose.5.phosphate.10 | -> YOR095C_1779097_at     | 6.31493869  | 0.08671197 | 61 | 0.617064 |
| YPL262W_1770087_at    | -> Fumaric_acid           | 6.2308764   | 0.08800323 | 62 | 0.617064 |
| YKL106W_1776650_at.3  | -> Tyrosine.4             | 6.1689076   | 0.08897594 | 63 | 0.617064 |
| Glycerol.5            | -> YHR104W_1779275_at     | 5.925393    | 0.09297933 | 64 | 0.617064 |

|                        |                           |            |             |    |          |
|------------------------|---------------------------|------------|-------------|----|----------|
| YKL104C_1778809_at.1   | -> Fructose.6.phosphate.9 | 5.90787805 | 0.09327893  | 65 | 0.617064 |
| YOL033W_1775445_at     | -> Glutamic_acid.20       | 5.8766443  | 0.09381722  | 66 | 0.617064 |
| Glucose.6.phosphate.8  | -> YBR126C_1779408_at     | 5.8481895  | 0.0943122   | 67 | 0.617064 |
| Serine.6               | -> YLR058C_1776401_at     | 5.83357707 | 0.09456808  | 68 | 0.617064 |
| Glucose.6.phosphate.2  | -> YMR261C_1773683_at     | 5.8159691  | 0.09487799  | 69 | 0.617064 |
| Proline.2              | -> YER087W_1776689_at     | 5.73346    | 0.09635318  | 70 | 0.617064 |
| Ribose.5.phosphate.5   | -> YKL181W_1776342_at     | 5.7125356  | 0.09673343  | 71 | 0.617064 |
| Fructose.4             | -> YIL172C_1775391_s_at   | 5.643745   | 0.098001519 | 72 | 0.617064 |
| YDR001C_1770456_at.1   | -> Trehalose              | 5.609209   | 0.09864873  | 73 | 0.617064 |
| Glutamic_acid.25       | -> YMR062C_1776272_at     | 5.511693   | 0.1005156   | 74 | 0.617064 |
| YHL032C_1769845_at     | -> Glycerol               | 5.219086   | 0.1064903   | 75 | 0.617064 |
| Isoleucine             | -> YPL040C_1776686_at     | 5.174396   | 0.1074555   | 76 | 0.617064 |
| Tyrosine               | -> YPL097W_1770460_at     | 4.99222045 | 0.1115472   | 77 | 0.617064 |
| YLR382C_1773389_at     | -> Leucine                | 4.9131467  | 0.1134057   | 78 | 0.617064 |
| Lysine.2               | -> YDR037W_1779238_at     | 4.852952   | 0.1148558   | 79 | 0.617064 |
| Ribose.5.phosphate     | -> YCR036W_1769967_at     | 4.805239   | 0.1160276   | 80 | 0.617064 |
| Glutamic_acid.13       | -> YGR019W_1774010_at     | 4.7838189  | 0.1165603   | 81 | 0.617064 |
| YOR303W_1773884_at     | -> Glutamic_acid.11       | 4.77184    | 0.1168599   | 82 | 0.617064 |
| Fructose.6.phosphate.4 | -> YER003C_1774627_at     | 4.6800934  | 0.1191989   | 83 | 0.617064 |
| Glutamic_acid.28       | -> YJL101C_1777080_at     | 4.61895158 | 0.120802    | 84 | 0.617064 |
| YHR011W_1770696_at     | -> Serine.2               | 4.594796   | 0.1214454   | 85 | 0.617064 |
| Asparagine.3           | -> YCR024C_1776019_at     | 4.5406244  | 0.1229094   | 86 | 0.617064 |
| Fructose.6.phosphate.2 | -> YJL155C_1774340_at     | 4.4303821  | 0.1259827   | 87 | 0.617064 |
| Glucose.2              | -> YDR001C_1770456_at     | 4.4120146  | 0.1265074   | 88 | 0.617064 |
| Trehalose              | -> YDR001C_1770456_at.1   | 4.394919   | 0.1269991   | 89 | 0.617064 |
| Glucose.11             | -> YCL040W_1779150_at     | 4.3822179  | 0.1273665   | 90 | 0.617064 |
| YOR184W_1774801_at     | -> Glutamic_acid.18       | 4.3779971  | 0.127489    | 91 | 0.617064 |
| YGL253W_1770167_at.3   | -> Glucose.6.phosphate.1  | 4.2711722  | 0.1306567   | 92 | 0.617064 |
| Serine                 | -> YER026C_1769395_at     | 4.124323   | 0.1352341   | 93 | 0.617064 |
| Fructose.6.phosphate.7 | -> YBR117C_1778142_at.1   | 4.1068744  | 0.135796    | 94 | 0.617064 |
| Succinic_acid.6        | -> YJL045W_1774888_at     | 4.024707   | 0.1384962   | 95 | 0.617064 |
| Fumaric_acid.3         | -> YDR178W_1772220_at.1   | 3.98551031 | 0.1398165   | 96 | 0.617064 |
| Glutamic_acid.5        | -> YOL140W_1772375_at     | 3.982862   | 0.1399065   | 97 | 0.617064 |

|                        |                           |             |            |     |          |
|------------------------|---------------------------|-------------|------------|-----|----------|
| YIL172C_1775391_s_at.1 | -> Glucose.5              | 3.96737     | 0.14043483 | 98  | 0.617064 |
| YBR299W_1774491_s_at.1 | -> Glucose.4              | 3.964895    | 0.1405195  | 99  | 0.617064 |
| Fumaric_acid.7         | -> YLL041C_1777010_at.1   | 3.9069643   | 0.1425275  | 100 | 0.617064 |
| Serine.11              | -> YCL004W_1779004_at     | 3.8882795   | 0.1431855  | 101 | 0.617064 |
| Glutamic_acid.26       | -> YKL106W_1776650_at.1   | 3.8325505   | 0.1451791  | 102 | 0.617064 |
| Glucose.7              | -> YFR053C_1775976_at.1   | 3.779361    | 0.1471262  | 103 | 0.617064 |
| Glutamic_acid.4        | -> YNR050C_1772003_at     | 3.75246425  | 0.1481278  | 104 | 0.617064 |
| Glutamic_acid.21       | -> YLR438W_1775480_at     | 3.71623902  | 0.1494952  | 105 | 0.617064 |
| Tyrosine.3             | -> YGR185C_1774768_at     | 3.693248    | 0.1503741  | 106 | 0.617064 |
| Serine.5               | -> YGR155W_1775526_at     | 3.675464    | 0.1510601  | 107 | 0.617064 |
| Glutamic_acid.38       | -> YGR061C_1780004_at     | 3.653481    | 0.1519154  | 108 | 0.617064 |
| YJL045W_1774888_at     | -> Succinic_acid.6        | 3.635057    | 0.1526386  | 109 | 0.617064 |
| Serine.3               | -> YGR208W_1771458_at     | 3.62997449  | 0.1528391  | 110 | 0.617064 |
| Proline                | -> YHR020W_1774658_at     | 3.629576    | 0.1528548  | 111 | 0.617064 |
| Glutamic_acid.15       | -> YPR035W_1774425_at     | 3.6022148   | 0.1539423  | 112 | 0.617064 |
| YIL116W_1774739_at     | -> Glutamic_acid.17       | 3.572082    | 0.1551552  | 113 | 0.617064 |
| YER026C_1769395_at     | -> Serine                 | 3.552965    | 0.1559332  | 114 | 0.617064 |
| YGR155W_1775526_at     | -> Serine.5               | 3.516402    | 0.1574398  | 115 | 0.617064 |
| Glucose.4              | -> YBR299W_1774491_s_at.1 | 3.512641    | 0.1575961  | 116 | 0.617064 |
| Arginine.3             | -> YPL111W_1778654_at     | 3.508841    | 0.15775442 | 117 | 0.617064 |
| Fumaric_acid.6         | -> YJL045W_1774888_at.1   | 3.3982239   | 0.1624829  | 118 | 0.617064 |
| Glutamic_acid.19       | -> YMR113W_1775174_at     | 3.393274995 | 0.1627001  | 119 | 0.617064 |
| Aspartic_acid.11       | -> YNL220W_1778156_at     | 3.38034399  | 0.1632699  | 120 | 0.617064 |
| YGR287C_1770859_at     | -> Fructose.2             | 3.3765529   | 0.1634376  | 121 | 0.617064 |
| YGL245W_1776080_at     | -> Glutamic_acid.24       | 3.343643    | 0.1649058  | 122 | 0.617064 |
| YHR208W_1779000_at.3   | -> Glutamic_acid.35       | 3.29160678  | 0.1672737  | 123 | 0.617064 |
| YPL262W_1770087_at.1   | -> Malic_acid.1           | 3.276975069 | 0.16795    | 124 | 0.617064 |
| Fructose.1             | -> YIL162W_1770506_at     | 3.2501516   | 0.1692019  | 125 | 0.617064 |
| Fumaric_acid.2         | -> YKL148C_1772202_at.1   | 3.2020499   | 0.1714874  | 126 | 0.617064 |
| Glycerol               | -> YHL032C_1769845_at     | 3.183675    | 0.1723744  | 127 | 0.617064 |
| Serine.12              | -> YGL026C_1779478_at     | 3.1128126   | 0.1758695  | 128 | 0.617064 |
| YBR001C_1776046_at.1   | -> Trehalose.1            | 3.096698    | 0.1766813  | 129 | 0.617064 |
| YGR185C_1774768_at     | -> Tyrosine.3             | 3.063533    | 0.1783723  | 130 | 0.617064 |

|                        |                         |             |             |     |          |
|------------------------|-------------------------|-------------|-------------|-----|----------|
| Phenylalanine.6        | -> YFL022C_1779336_at   | 3.052064    | 0.17896355  | 131 | 0.617064 |
| Glutamic_acid.23       | -> YMR300C_1775736_at   | 3.0415087   | 0.1795106   | 132 | 0.617064 |
| Fructose.6.phosphate.3 | -> YGR240C_1774445_at   | 3.0401617   | 0.1795807   | 133 | 0.617064 |
| Glutamic_acid.24       | -> YGL245W_1776080_at   | 3.021829    | 0.1805383   | 134 | 0.617064 |
| Phenylalanine.5        | -> YLR060W_1777242_at   | 2.899288    | 0.18717091  | 135 | 0.631448 |
| Serine.7               | -> YER086W_1776603_at   | 2.893329    | 0.1875041   | 136 | 0.631448 |
| Serine.2               | -> YHR011W_1770696_at   | 2.849083    | 0.19001     | 137 | 0.635216 |
| YCR036W_1769967_at     | -> Ribose.5.phosphate   | 2.797906    | 0.1929809   | 138 | 0.637679 |
| YDL246C_1777143_s_at   | -> Fructose.6           | 2.78857212  | 0.1935314   | 139 | 0.637679 |
| Fructose.6.phosphate.1 | -> YMR205C_1772999_at   | 2.7223195   | 0.1975174   | 140 | 0.646164 |
| Aspartic_acid.4        | -> YLR027C_1774241_at   | 2.6196493   | 0.2039804   | 141 | 0.662575 |
| Glyceric_acid          | -> YER073W_1771943_at   | 2.5851649   | 0.2062334   | 142 | 0.665175 |
| Isoleucine.2           | -> YHR208W_1779000_at.1 | 2.536897    | 0.2094599   | 143 | 0.666892 |
| YHR020W_1774658_at     | -> Proline              | 2.516999    | 0.2108154   | 144 | 0.666892 |
| Ribose.5.phosphate.11  | -> YER099C_1779140_at   | 2.49935436  | 0.2120301   | 145 | 0.666892 |
| YOR241W_1778173_at     | -> Glutamic_acid.31     | 2.4711893   | 0.2139944   | 146 | 0.666892 |
| Glutamic_acid.9        | -> YDL215C_1773457_at   | 2.470452    | 0.2140462   | 147 | 0.666892 |
| Glutamic_acid.1        | -> YLR089C_1769691_at.1 | 2.3767      | 0.2208198   | 148 | 0.678285 |
| Glyceric_acid.2        | -> YPL061W_1778325_at   | 2.3686612   | 0.2214179   | 149 | 0.678285 |
| YBR111C_1771955_at     | -> Ribose.5.phosphate.3 | 2.358927    | 0.2221458   | 150 | 0.678285 |
| Fructose.3             | -> YBR299W_1774491_s_at | 2.300237    | 0.226624334 | 151 | 0.683076 |
| YLR089C_1769691_at.1   | -> Glutamic_acid.1      | 2.299294    | 0.2266976   | 152 | 0.683076 |
| Glutamic_acid.36       | -> YJL130C_1779682_at   | 2.267991    | 0.2291522   | 153 | 0.685959 |
| Fructose.5             | -> YFR053C_1775976_at   | 2.230007    | 0.2321932   | 154 | 0.690549 |
| YER087W_1776689_at     | -> Proline.2            | 2.198955    | 0.2347319   | 155 | 0.693595 |
| Leucine.2              | -> YJR148W_1777344_at   | 2.144787    | 0.2392778   | 156 | 0.697306 |
| YMR062C_1776272_at     | -> Glutamic_acid.25     | 2.120441    | 0.2413712   | 157 | 0.697306 |
| YOR375C_1778816_at     | -> Glutamic_acid.34     | 2.115926    | 0.241763    | 158 | 0.697306 |
| Fructose.6.phosphate.6 | -> YLR377C_1776768_at   | 2.086396    | 0.2443528   | 159 | 0.697306 |
| Glucose.10             | -> YJL216C_1778617_at.1 | 2.075099    | 0.2453564   | 160 | 0.697306 |
| Threonine.1            | -> YKL194C_1769828_at   | 2.0462858   | 0.247949    | 161 | 0.697306 |
| Phenylalanine.4        | -> YNL316C_1777156_at   | 2.043557    | 0.248197    | 162 | 0.697306 |
| Fructose.6.phosphate.5 | -> YFR053C_1775976_at.2 | 2.019005644 | 0.2504482   | 163 | 0.697306 |

|                      |                         |            |            |     |          |
|----------------------|-------------------------|------------|------------|-----|----------|
| Phenylalanine        | -> YPR047W_1773228_at   | 2.012813   | 0.2510216  | 164 | 0.697306 |
| Succinic_acid.7      | -> YJR130C_1775462_at   | 2.0107557  | 0.2512127  | 165 | 0.697306 |
| Glutamic_acid.16     | -> YMR250W_1774495_at.1 | 1.9660261  | 0.2554297  | 166 | 0.70356  |
| YDR321W_1775295_at.1 | -> Asparagine.2         | 1.9544832  | 0.2565381  | 167 | 0.70356  |
| Citric_acid.2        | -> YLR304C_1778035_at   | 1.924493   | 0.2594579  | 168 | 0.706124 |
| Glycerol.3           | -> YBR184W_1775738_at   | 1.91165013 | 0.2607261  | 169 | 0.706124 |
| YJL130C_1779682_at   | -> Glutamic_acid.36     | 1.860389   | 0.2658986  | 170 | 0.706124 |
| YDL215C_1773457_at   | -> Glutamic_acid.9      | 1.857714   | 0.2661735  | 171 | 0.706124 |
| YLR231C_1771376_at   | -> Alanine.2            | 1.845396   | 0.2674458  | 172 | 0.706124 |
| Fumaric_acid.4       | -> YHR018C_1772287_at   | 1.845076   | 0.267479   | 173 | 0.706124 |
| Isoleucine.1         | -> YJR148W_1777344_at.1 | 1.83751259 | 0.2682656  | 174 | 0.706124 |
| Succinic_acid.2      | -> YEL047C_1771840_at   | 1.8046186  | 0.2717349  | 175 | 0.708558 |
| YIL053W_1773703_at   | -> Glycerol.2           | 1.7994769  | 0.2722844  | 176 | 0.708558 |
| YMR118C_1773702_at.1 | -> Fumaric_acid.5       | 1.71681404 | 0.2813953  | 177 | 0.72813  |
| Glutamic_acid.17     | -> YIL116W_1774739_at   | 1.679014   | 0.2857434  | 178 | 0.735227 |
| Glutamic_acid.10     | -> YDR300C_1773540_at   | 1.659282   | 0.2880609  | 179 | 0.735324 |
| Phenylalanine.2      | -> YIL116W_1774739_at.1 | 1.626418   | 0.29199588 | 180 | 0.735324 |
| YHR208W_1779000_at   | -> Leucine.3            | 1.61712131 | 0.2931263  | 181 | 0.735324 |
| YIR034C_1770279_at   | -> Lysine               | 1.615943   | 0.2932702  | 182 | 0.735324 |
| Glutamic_acid.2      | -> YLR299W_1769870_at   | 1.594923   | 0.2958575  | 183 | 0.735324 |
| Succinic_acid.13     | -> YJR051W_1778330_at   | 1.5894042  | 0.2965437  | 184 | 0.735324 |
| YPR145W_1772615_at.1 | -> Glutamic_acid.7      | 1.55051    | 0.3014607  | 185 | 0.735324 |
| Valine.2             | -> YGR094W_1780055_at   | 1.5429308  | 0.3024359  | 186 | 0.735324 |
| YHR208W_1779000_at.1 | -> Isoleucine.2         | 1.525333   | 0.304722   | 187 | 0.735324 |
| YGL253W_1770167_at.2 | -> Fructose.6.phosphate | 1.51396    | 0.30621611 | 188 | 0.735324 |
| YGR061C_1780004_at   | -> Glutamic_acid.38     | 1.510562   | 0.3066651  | 189 | 0.735324 |
| YDR037W_1779238_at   | -> Lysine.2             | 1.498958   | 0.3082071  | 190 | 0.735324 |
| Alanine.2            | -> YLR231C_1771376_at   | 1.484673   | 0.3101247  | 191 | 0.735324 |
| YIL116W_1774739_at.2 | -> Tyrosine.2           | 1.4652716  | 0.3127635  | 192 | 0.735324 |
| Aspartic_acid.1      | -> YER052C_1772562_at   | 1.46191838 | 0.3132237  | 193 | 0.735324 |
| YBR117C_1778142_at   | -> Ribose.5.phosphate.7 | 1.44316887 | 0.3158196  | 194 | 0.735324 |
| Leucine.1            | -> YPL160W_1776027_at   | 1.431911   | 0.3173969  | 195 | 0.735324 |
| Glutamic_acid.34     | -> YOR375C_1778816_at   | 1.421674   | 0.3188437  | 196 | 0.735324 |

|                      |                           |             |             |     |          |
|----------------------|---------------------------|-------------|-------------|-----|----------|
| Glutamic_acid.11     | -> YOR303W_1773884_at     | 1.420598    | 0.3189964   | 197 | 0.735324 |
| YFL030W_1770767_at.1 | -> Alanine.1              | 1.419026    | 0.31921972  | 198 | 0.735324 |
| YLR299W_1769870_at   | -> Glutamic_acid.2        | 1.401825    | 0.3216829   | 199 | 0.735324 |
| Fumaric_acid.8       | -> YKL141W_1777334_at.1   | 1.384747402 | 0.3241625   | 200 | 0.735324 |
| YJR148W_1777344_at   | -> Leucine.2              | 1.371858    | 0.3260572   | 201 | 0.735324 |
| Glutamic_acid.7      | -> YPR145W_1772615_at.1   | 1.370534    | 0.3262529   | 202 | 0.735324 |
| YPL040C_1776686_at   | -> Isoleucine             | 1.357964    | 0.3281219   | 203 | 0.735324 |
| YHR018C_1772287_at   | -> Fumaric_acid.4         | 1.33011     | 0.3323339   | 204 | 0.735324 |
| YEL046C_1772625_at   | -> Glycine.1              | 1.3244305   | 0.3332047   | 205 | 0.735324 |
| YPL160W_1776027_at   | -> Leucine.1              | 1.31152     | 0.3352      | 206 | 0.735324 |
| YOL140W_1772375_at   | -> Glutamic_acid.5        | 1.310258    | 0.3353962   | 207 | 0.735324 |
| Malic_acid.3         | -> YKL029C_1776811_at     | 1.3029154   | 0.3365419   | 208 | 0.735324 |
| Ribose.5.phosphate.3 | -> YBR111C_1771955_at     | 1.295346    | 0.3377305   | 209 | 0.735324 |
| YDR321W_1775295_at   | -> Aspartic_acid.6        | 1.2910905   | 0.3384021   | 210 | 0.735324 |
| Glutamic_acid.8      | -> YHR037W_1773117_at     | 1.288813    | 0.3387626   | 211 | 0.735324 |
| YJL216C_1778617_at.1 | -> Glucose.10             | 1.241955    | 0.3463372   | 212 | 0.748219 |
| YFR053C_1775976_at.1 | -> Glucose.7              | 1.217915    | 0.3503449   | 213 | 0.753324 |
| YDR341C_1773272_at   | -> Arginine.1             | 1.207041    | 0.352185991 | 214 | 0.753744 |
| Valine               | -> YJR148W_1777344_at.2   | 1.1857572   | 0.3558413   | 215 | 0.75577  |
| YLR027C_1774241_at.3 | -> Tyrosine.1             | 1.1731034   | 0.3580478   | 216 | 0.75577  |
| YLR377C_1776768_at   | -> Fructose.6.phosphate.6 | 1.170819    | 0.3584488   | 217 | 0.75577  |
| YDR300C_1773540_at   | -> Glutamic_acid.10       | 1.154675    | 0.361307    | 218 | 0.75577  |
| Alanine              | -> YLR089C_1769691_at     | 1.139752    | 0.36398668  | 219 | 0.75577  |
| YHR104W_1779275_at   | -> Glycerol.5             | 1.138857    | 0.36414849  | 220 | 0.75577  |
| Citric_acid          | -> YJL200C_1769943_at     | 1.135903    | 0.36468384  | 221 | 0.75577  |
| Ribose.5.phosphate.9 | -> YMR105C_1778907_at     | 1.1032562   | 0.3706983   | 222 | 0.764774 |
| Arginine.2           | -> YHR091C_1774813_at     | 1.0797696   | 0.3751407   | 223 | 0.770468 |
| YHR037W_1773117_at   | -> Glutamic_acid.8        | 1.026806    | 0.3855334   | 224 | 0.78261  |
| Glucose.3            | -> YGR287C_1770859_at.1   | 1.0266416   | 0.3855665   | 225 | 0.78261  |
| YKL104C_1778809_at   | -> Glutamic_acid.33       | 1.02360479  | 0.3861788   | 226 | 0.78261  |
| YJR148W_1777344_at.3 | -> Glutamic_acid.30       | 1.0127818   | 0.3883764   | 227 | 0.783596 |
| Glycine.2            | -> YBR263W_1774806_at.1   | 0.993017652 | 0.3924509   | 228 | 0.785399 |
| Glutamic_acid.18     | -> YOR184W_1774801_at     | 0.9835354   | 0.3944345   | 229 | 0.785399 |

|                      |                           |            |            |     |          |
|----------------------|---------------------------|------------|------------|-----|----------|
| YOL049W_1778316_at   | -> Glycine.6              | 0.97494978 | 0.3962471  | 230 | 0.785399 |
| YML100W_1774756_at   | -> Glucose.6.phosphate.3  | 0.974526   | 0.39633693 | 231 | 0.785399 |
| YGR244C_1778290_at   | -> Succinic_acid.12       | 0.9638652  | 0.3986107  | 232 | 0.785399 |
| YLR027C_1774241_at.2 | -> Phenylalanine.1        | 0.9582337  | 0.3998219  | 233 | 0.785399 |
| Aspartic_acid.6      | -> YDR321W_1775295_at     | 0.9379614  | 0.4042404  | 234 | 0.785399 |
| YJL216C_1778617_at   | -> Fructose.7             | 0.9190064  | 0.4084569  | 235 | 0.785399 |
| YHR025W_1777312_at   | -> Homoserine.1           | 0.9092708  | 0.4106556  | 236 | 0.785399 |
| Glutamic_acid.30     | -> YJR148W_1777344_at.3   | 0.9029012  | 0.4121064  | 237 | 0.785399 |
| YLL058W_1770340_at   | -> Succinic_acid          | 0.89202012 | 0.4146077  | 238 | 0.785399 |
| Asparagine           | -> YGR124W_1769642_at.2   | 0.8846908  | 0.416309   | 239 | 0.785399 |
| Homoserine.1         | -> YHR025W_1777312_at     | 0.875202   | 0.4185318  | 240 | 0.785399 |
| YGR240C_1774445_at   | -> Fructose.6.phosphate.3 | 0.8746943  | 0.4186514  | 241 | 0.785399 |
| YMR296C_1776857_at   | -> Serine.8               | 0.8708464  | 0.4195598  | 242 | 0.785399 |
| YER086W_1776603_at   | -> Serine.7               | 0.86928    | 0.4199307  | 243 | 0.785399 |
| YCL064C_1778479_at   | -> Serine.10              | 0.862869   | 0.42145539 | 244 | 0.785399 |
| YEL046C_1772625_at.1 | -> Threonine.2            | 0.86142555 | 0.4218001  | 245 | 0.785399 |
| YBR196C_1779775_at.1 | -> Glucose.6.phosphate.9  | 0.8413007  | 0.42666448 | 246 | 0.785399 |
| Arginine             | -> YHR018C_1772287_at.1   | 0.841093   | 0.4267153  | 247 | 0.785399 |
| YJR130C_1775462_at   | -> Succinic_acid.7        | 0.8288603  | 0.4297264  | 248 | 0.785399 |
| YGR019W_1774010_at   | -> Glutamic_acid.13       | 0.8220575  | 0.4314189  | 249 | 0.785399 |
| YDR111C_1778563_at   | -> Alanine.4              | 0.8209187  | 0.4317035  | 250 | 0.785399 |
| YEL047C_1771840_at.1 | -> Fumaric_acid.1         | 0.812239   | 0.4338848  | 251 | 0.785399 |
| Aspartic_acid.3      | -> YAR015W_1774134_at     | 0.80237307 | 0.4363907  | 252 | 0.785399 |
| Lysine.1             | -> YNL073W_1771061_at     | 0.8017537  | 0.4365489  | 253 | 0.785399 |
| YMR105C_1778907_at   | -> Ribose.5.phosphate.9   | 0.8001508  | 0.436959   | 254 | 0.785399 |
| YBL076C_1779139_at   | -> Isoleucine.3           | 0.7975933  | 0.4376149  | 255 | 0.785399 |
| YDL078C_1778808_at   | -> Malic_acid.4           | 0.7922164  | 0.43900016 | 256 | 0.785399 |
| YKL181W_1776342_at   | -> Ribose.5.phosphate.5   | 0.7845001  | 0.44100329 | 257 | 0.785912 |
| YBR263W_1774806_at   | -> Serine.4               | 0.7586986  | 0.44783437 | 258 | 0.789198 |
| Succinic_acid.10     | -> YKL141W_1777334_at     | 0.7549148  | 0.4488538  | 259 | 0.789198 |
| Glycerol.2           | -> YIL053W_1773703_at     | 0.7495398  | 0.4503099  | 260 | 0.789198 |
| Fructose.2           | -> YGR287C_1770859_at     | 0.7414291  | 0.452525   | 261 | 0.789198 |
| Ribose.5.phosphate.8 | -> YPR074C_1778503_at     | 0.7394086  | 0.4530801  | 262 | 0.789198 |



|                             |                                |            |            |     |          |
|-----------------------------|--------------------------------|------------|------------|-----|----------|
| Ribose.5.phosphate.1        | -> YOL061W_1770747_at          | 0.73902489 | 0.4531857  | 263 | 0.789198 |
| Glycerol.1                  | -> YMR318C_1770754_at          | 0.7306457  | 0.45550383 | 264 | 0.789781 |
| YLR142W_1775678_at          | -> Proline.1                   | 0.7253923  | 0.4569693  | 265 | 0.789781 |
| Fructose.6.phosphate.10     | -> YBR196C_1779775_at          | 0.71419122 | 0.4601257  | 266 | 0.792247 |
| Glucose.6.phosphate.1       | -> YGL253W_1770167_at.3        | 0.6973165  | 0.4649644  | 267 | 0.797579 |
| YLR164W_1779688_at.1        | -> Fumaric_acid.11             | 0.6830946  | 0.46912294 | 268 | 0.80171  |
| Serine.8                    | -> YMR296C_1776857_at          | 0.6752688  | 0.4714435  | 269 | 0.802681 |
| Glyceric_acid.3.phosphate.1 | -> YER081W_1779031_at          | 0.6659081  | 0.4742501  | 270 | 0.804469 |
| YKL106W_1776650_at.1        | -> Glutamic_acid.26            | 0.6447848  | 0.4807104  | 271 | 0.812418 |
| Glutamic_acid.14            | -> YLR027C_1774241_at.1        | 0.5971329  | 0.495972   | 272 | 0.835048 |
| Aspartic_acid.2             | -> YPR145W_1772615_at          | 0.5917885  | 0.4977467  | 273 | 0.835048 |
| YGL026C_1779478_at          | -> Serine.12                   | 0.5826807  | 0.500802   | 274 | 0.837107 |
| YOL058W_1779309_at          | -> Aspartic_acid.12            | 0.5768902  | 0.5027651  | 275 | 0.837332 |
| YLR027C_1774241_at.1        | -> Glutamic_acid.14            | 0.5699336  | 0.505145   | 276 | 0.83775  |
| Glyceric_acid.3.phosphate   | -> YIL074C_1773600_at          | 0.5655006  | 0.506674   | 277 | 0.83775  |
| YPR074C_1778503_at          | -> Ribose.5.phosphate.8        | 0.5522977  | 0.5112867  | 278 | 0.841903 |
| Succinic_acid.12            | -> YGR244C_1778290_at          | 0.5478452  | 0.5128624  | 279 | 0.841903 |
| YHR091C_1774813_at          | -> Arginine.2                  | 0.5332162  | 0.5181134  | 280 | 0.844999 |
| Glutamic_acid.31            | -> YOR241W_1778173_at          | 0.5227695  | 0.5219344  | 281 | 0.844999 |
| Phenylalanine.1             | -> YLR027C_1774241_at.2        | 0.5212439  | 0.5224976  | 282 | 0.844999 |
| Asparagine.2                | -> YDR321W_1775295_at.1        | 0.5172857  | 0.5239647  | 283 | 0.844999 |
| YJL071W_1773952_at          | -> Glutamic_acid.12            | 0.5161527  | 0.52438623 | 284 | 0.844999 |
| Glutamic_acid.32            | -> YDR111C_1778563_at.1        | 0.5123193  | 0.5258181  | 285 | 0.844999 |
| YER023W_1778412_at          | -> Proline.3                   | 0.4953604  | 0.53225609 | 286 | 0.849679 |
| Tyrosine.4                  | -> YKL106W_1776650_at.3        | 0.4908478  | 0.53399828 | 287 | 0.849679 |
| YER081W_1779031_at          | -> Glyceric_acid.3.phosphate.1 | 0.4900267  | 0.5343166  | 288 | 0.849679 |
| YLR058C_1776401_at.1        | -> Glycine.4                   | 0.4853166  | 0.5361509  | 289 | 0.849679 |
| Succinic_acid.14            | -> YLR164W_1779688_at          | 0.4746753  | 0.5403465  | 290 | 0.852185 |
| YCL040W_1779150_at          | -> Glucose.11                  | 0.4718966  | 0.541454   | 291 | 0.852185 |
| YMR250W_1774495_at          | -> Aspartic_acid.5             | 0.46499638 | 0.5442262  | 292 | 0.853615 |
| YBR117C_1778142_at.1        | -> Fructose.6.phosphate.7      | 0.4520253  | 0.5495241  | 293 | 0.855425 |
| YKL141W_1777334_at          | -> Succinic_acid.10            | 0.4512836  | 0.5498305  | 294 | 0.855425 |
| Isoleucine.3                | -> YBL076C_1779139_at          | 0.4442181  | 0.552769   | 295 | 0.855425 |

|                        |                           |             |            |     |          |
|------------------------|---------------------------|-------------|------------|-----|----------|
| YCL040W_1779150_at.1   | -> Glucose.6.phosphate.7  | 0.4440224   | 0.55285087 | 296 | 0.855425 |
| YHR208W_1779000_at.2   | -> Valine.1               | 0.4265997   | 0.5602534  | 297 | 0.856637 |
| YGR287C_1770859_at.1   | -> Glucose.3              | 0.4172477   | 0.5643208  | 298 | 0.856637 |
| YLL018C_1776523_at     | -> Aspartic_acid.7        | 0.415753237 | 0.564977   | 299 | 0.856637 |
| Leucine                | -> YLR382C_1773389_at     | 0.4156212   | 0.5650351  | 300 | 0.856637 |
| Homoserine             | -> YJR139C_1769510_at.1   | 0.411024    | 0.5670654  | 301 | 0.856637 |
| YOR142W_1778018_at     | -> Succinic_acid.11       | 0.4089158   | 0.5680021  | 302 | 0.856637 |
| Glutamic_acid.6        | -> YAL062W_1772549_at     | 0.4044236   | 0.57001    | 303 | 0.856637 |
| YCRO24C_1776019_at     | -> Asparagine.3           | 0.4017956   | 0.5711923  | 304 | 0.856637 |
| Fructose.6.phosphate.8 | -> YPR074C_1778503_at.1   | 0.392034807 | 0.5756339  | 305 | 0.856637 |
| YDR111C_1778563_at.1   | -> Glutamic_acid.32       | 0.389979    | 0.5765797  | 306 | 0.856637 |
| Glycine.4              | -> YLR058C_1776401_at.1   | 0.3891055   | 0.5769826  | 307 | 0.856637 |
| YDR178W_1772220_at     | -> Succinic_acid.4        | 0.3880576   | 0.577467   | 308 | 0.856637 |
| YKL194C_1769828_at     | -> Threonine.1            | 0.3842027   | 0.5792567  | 309 | 0.856637 |
| YHR074W_1775518_at     | -> Glutamic_acid.22       | 0.3829961   | 0.57981965 | 310 | 0.856637 |
| YER003C_1774627_at     | -> Fructose.6.phosphate.4 | 0.3781155   | 0.5821097  | 311 | 0.857255 |
| YGR094W_1780055_at     | -> Valine.2               | 0.3709124   | 0.585529   | 312 | 0.85895  |
| YDR232W_1775965_at     | -> Glycine.3              | 0.36401525  | 0.5888481  | 313 | 0.85895  |
| Glycine.5              | -> YGL234W_1778252_at     | 0.3622843   | 0.5896882  | 314 | 0.85895  |
| Glutamic_acid.20       | -> YOL033W_1775445_at     | 0.3600786   | 0.59076283 | 315 | 0.85895  |
| Succinic_acid.15       | -> YER065C_1779905_at     | 0.35335404  | 0.5940684  | 316 | 0.861023 |
| YJL045W_1774888_at.1   | -> Fumaric_acid.6         | 0.3433464   | 0.5990715  | 317 | 0.861432 |
| YHL011C_1776097_at     | -> Ribose.5.phosphate.4   | 0.3420322   | 0.59973612 | 318 | 0.861432 |
| Asparagine.1           | -> YPR145W_1772615_at.2   | 0.3369427   | 0.60232709 | 319 | 0.861432 |
| YDR516C_1770001_at     | -> Glucose                | 0.3364457   | 0.6025816  | 320 | 0.861432 |
| YMR205C_1772999_at     | -> Fructose.6.phosphate.1 | 0.3341618   | 0.6037545  | 321 | 0.861432 |
| YMR217W_1779734_at     | -> Glutamic_acid.37       | 0.3216385   | 0.61028719 | 322 | 0.867847 |
| Tyrosine.2             | -> YIL116W_1774739_at.2   | 0.3183338   | 0.6120405  | 323 | 0.867847 |
| YHR018C_1772287_at.1   | -> Arginine               | 0.3053532   | 0.6190515  | 324 | 0.874558 |
| Fructose.7             | -> YJL216C_1778617_at     | 0.3014297   | 0.6212108  | 325 | 0.874558 |
| YBR006W_1775744_at     | -> Succinic_acid.8        | 0.29910042  | 0.6225019  | 326 | 0.874558 |
| Threonine.4            | -> YER086W_1776603_at.1   | 0.2826022   | 0.6318474  | 327 | 0.877093 |
| YBR126C_1779408_at     | -> Glucose.6.phosphate.8  | 0.2808889   | 0.6328388  | 328 | 0.877093 |

|                        |                              |             |            |     |          |
|------------------------|------------------------------|-------------|------------|-----|----------|
| YEL047C_1771840_at     | -> Succinic_acid.2           | 0.2804645   | 0.633085   | 329 | 0.877093 |
| Alanine.4              | -> YDR111C_1778563_at        | 0.276765    | 0.6352419  | 330 | 0.877093 |
| Glycine.1              | -> YEL046C_1772625_at        | 0.2762253   | 0.6355582  | 331 | 0.877093 |
| YPR026W_1777053_at     | -> Glucose.9                 | 0.2758191   | 0.63579645 | 332 | 0.877093 |
| Proline.1              | -> YLR142W_1775678_at        | 0.2684591   | 0.6401555  | 333 | 0.879503 |
| YIL162W_1770506_at     | -> Fructose.1                | 0.2664079   | 0.6413845  | 334 | 0.879503 |
| YKL148C_1772202_at     | -> Succinic_acid.3           | 0.26212814  | 0.6439691  | 335 | 0.879754 |
| YKL029C_1776811_at     | -> Malic_acid.3              | 0.2566758   | 0.6473025  | 336 | 0.879754 |
| YLL041C_1777010_at.1   | -> Fumaric_acid.7            | 0.2566313   | 0.6473299  | 337 | 0.879754 |
| YBL068W_1770750_at     | -> Ribose.5.phosphate.2      | 0.2532421   | 0.6494258  | 338 | 0.879991 |
| YLR164W_1779688_at     | -> Succinic_acid.14          | 0.2444755   | 0.6549336  | 339 | 0.883293 |
| YGR124W_1769642_at.1   | -> Glutamic_acid             | 0.243241    | 0.65571948 | 340 | 0.883293 |
| YJR139C_1769510_at.1   | -> Homoserine                | 0.2338451   | 0.6617874  | 341 | 0.88817  |
| YKL148C_1772202_at.1   | -> Fumaric_acid.2            | 0.2297112   | 0.664507   | 342 | 0.88817  |
| YBR184W_1775738_at.1   | -> Glucose.6                 | 0.2261816   | 0.66685412 | 343 | 0.88817  |
| Aspartic_acid.12       | -> YOL058W_1779309_at        | 0.222533    | 0.6693051  | 344 | 0.88817  |
| YER062C_1778996_at     | -> Glycerol.4                | 2.18E-01    | 0.6723425  | 345 | 0.88817  |
| Tyrosine.1             | -> YLR027C_1774241_at.3      | 0.2171512   | 0.6729675  | 346 | 0.88817  |
| Succinic_acid.5        | -> YMR118C_1773702_at        | 0.2151066   | 0.6743741  | 347 | 0.88817  |
| YDR001C_1770456_at     | -> Glucose.2                 | 0.2085716   | 0.6789272  | 348 | 0.88817  |
| YLR027C_1774241_at     | -> Aspartic_acid.4           | 0.2050951   | 0.6813861  | 349 | 0.88817  |
| Threonine              | -> YJR139C_1769510_at        | 0.201317909 | 0.6840876  | 350 | 0.88817  |
| Threonine.3            | -> YIL078W_1774604_at        | 0.20047291  | 0.6846963  | 351 | 0.88817  |
| YMR261C_1773683_at     | -> Glucose.6.phosphate.2     | 0.199396    | 0.68547434 | 352 | 0.88817  |
| YMR300C_1775736_at     | -> Glutamic_acid.23          | 0.1965038   | 0.687577   | 353 | 0.88817  |
| Fumaric_acid.1         | -> YEL047C_1771840_at.1      | 0.1914141   | 0.6913246  | 354 | 0.88817  |
| YFR053C_1775976_at.3   | -> Glucose.6.phosphate.4     | 0.1907226   | 0.6918385  | 355 | 0.88817  |
| YMR250W_1774495_at.1   | -> Glutamic_acid.16          | 0.1861448   | 0.6952701  | 356 | 0.88817  |
| Alanine.3              | -> YOR335C_1776171_at        | 0.18429039  | 0.696675   | 357 | 0.88817  |
| YMR118C_1773702_at     | -> Succinic_acid.5           | 0.1838376   | 0.6970194  | 358 | 0.88817  |
| YDR516C_1770001_at.1   | -> Glucose.6.phosphate       | 0.1827896   | 0.69781841 | 359 | 0.88817  |
| YLR155C_1777566_s_at.1 | -> Asparagine.4              | 0.18238867  | 0.6981249  | 360 | 0.88817  |
| YIL074C_1773600_at     | -> Glyceric_acid.3.phosphate | 0.1782047   | 0.7013477  | 361 | 0.889798 |

|                      |                            |            |            |     |          |
|----------------------|----------------------------|------------|------------|-----|----------|
| YCL004W_1779004_at   | -> Serine.11               | 0.1716666  | 0.7064777  | 362 | 0.893513 |
| YCL064C_1778479_at.1 | -> Threonine.5             | 0.1650606  | 0.7117833  | 363 | 0.893513 |
| YNL073W_1771061_at   | -> Lysine.1                | 0.1646809  | 0.7120921  | 364 | 0.893513 |
| YPL104W_1776799_at   | -> Aspartic_acid.9         | 0.16461424 | 0.7121464  | 365 | 0.893513 |
| YDR062W_1770116_at   | -> Serine.1                | 0.159554   | 0.71630481 | 366 | 0.893513 |
| YJL155C_1774340_at   | -> Fructose.6.phosphate.2  | 0.1593757  | 0.7164528  | 367 | 0.893513 |
| Glutamic_acid.3      | -> YKL132C_1769938_at      | 0.15746827 | 0.718042   | 368 | 0.893513 |
| Fumaric_acid.10      | -> YJR051W_1778330_at.1    | 0.1520774  | 0.72259663 | 369 | 0.893513 |
| YJR109C_1777097_at   | -> Glutamic_acid.29        | 0.1478174  | 0.72626444 | 370 | 0.893513 |
| Homoserine.2         | -> YNL277W_1779413_at      | 0.14658073 | 0.7273409  | 371 | 0.893513 |
| YGL234W_1778252_at   | -> Glycine.5               | 0.1453329  | 0.7284326  | 372 | 0.893513 |
| YER086W_1776603_at.1 | -> Threonine.4             | 0.144975   | 0.7287468  | 373 | 0.893513 |
| YER073W_1771943_at   | -> Glyceric_acid           | 0.1439637  | 0.7296369  | 374 | 0.893513 |
| YLR359W_1777563_at   | -> Fumaric_acid.9          | 0.1403299  | 0.73286622 | 375 | 0.895074 |
| YGR124W_1769642_at.2 | -> Asparagine              | 0.1364419  | 0.7363765  | 376 | 0.896969 |
| YJR148W_1777344_at.2 | -> Valine                  | 0.1281064  | 0.744105   | 377 | 0.903979 |
| Succinic_acid.11     | -> YOR142W_1778018_at      | 0.115332   | 0.7565388  | 378 | 0.908405 |
| Aspartic_acid.8      | -> YKL106W_1776650_at      | 0.11488649 | 0.7569864  | 379 | 0.908405 |
| Succinic_acid.1      | -> YPR006C_1770947_at      | 0.11483325 | 0.75704    | 380 | 0.908405 |
| YJR051W_1778330_at   | -> Succinic_acid.13        | 0.1146389  | 0.7572357  | 381 | 0.908405 |
| YOR374W_1776624_at   | -> Glyceric_acid.1         | 0.1142123  | 0.75766571 | 382 | 0.908405 |
| YGL253W_1770167_at.1 | -> Glucose.1               | 0.1117118  | 0.7602054  | 383 | 0.908413 |
| YPL061W_1778325_at   | -> Glyceric_acid.2         | 0.1087541  | 0.7632519  | 384 | 0.908413 |
| YLL041C_1777010_at   | -> Succinic_acid.9         | 0.10664521 | 0.7654529  | 385 | 0.908413 |
| Valine.1             | -> YHR208W_1779000_at.2    | 0.1065001  | 0.7656053  | 386 | 0.908413 |
| Threonine.5          | -> YCL064C_1778479_at.1    | 0.1042909  | 0.7679396  | 387 | 0.908828 |
| YLR058C_1776401_at   | -> Serine.6                | 0.09960726 | 0.77298289 | 388 | 0.912439 |
| YBR196C_1779775_at   | -> Fructose.6.phosphate.10 | 0.08512727 | 0.7894779  | 389 | 0.925677 |
| YKL127W_1777971_at   | -> Ribose.5.phosphate.6    | 0.08481108 | 0.7898549  | 390 | 0.925677 |
| YBR184W_1775738_at   | -> Glycerol.3              | 0.08447066 | 0.7902617  | 391 | 0.925677 |
| Glutamic_acid.33     | -> YKL104C_1778809_at      | 0.08139087 | 0.7939841  | 392 | 0.927649 |
| Succinic_acid.9      | -> YLL041C_1777010_at      | 0.07975302 | 0.7959954  | 393 | 0.927649 |
| Leucine.3            | -> YHR208W_1779000_at      | 0.07681724 | 0.7996585  | 394 | 0.929552 |

|                      |                           |            |             |     |          |
|----------------------|---------------------------|------------|-------------|-----|----------|
| Phenylalanine.3      | -> YKL106W_1776650_at.2   | 0.07458709 | 0.802492965 | 395 | 0.930486 |
| YNL277W_1779413_at   | -> Homoserine.2           | 0.07218878 | 0.8055935   | 396 | 0.931722 |
| YER099C_1779140_at   | -> Ribose.5.phosphate.11  | 0.06726753 | 0.8121369   | 397 | 0.935763 |
| YDL171C_1776998_at   | -> Glutamic_acid.27       | 0.06624742 | 0.8135256   | 398 | 0.935763 |
| YKL132C_1769938_at   | -> Glutamic_acid.3        | 0.06479856 | 0.815518    | 399 | 0.935763 |
| YDR178W_1772220_at.1 | -> Fumaric_acid.3         | 0.06354605 | 0.8172601   | 400 | 0.935763 |
| YPR035W_1774425_at   | -> Glutamic_acid.15       | 0.0601128  | 0.8221326   | 401 | 0.938539 |
| YPR006C_1770947_at   | -> Succinic_acid.1        | 0.05800051 | 0.8252053   | 402 | 0.938539 |
| Fumaric_acid         | -> YPL262W_1770087_at     | 0.05639315 | 0.82758407  | 403 | 0.938539 |
| YIL078W_1774604_at   | -> Threonine.3            | 0.05619409 | 0.8278812   | 404 | 0.938539 |
| Aspartic_acid        | -> YGR124W_1769642_at     | 0.05178235 | 0.83461689  | 405 | 0.941601 |
| Citric_acid.1        | -> YGL205W_1776791_at     | 0.05173286 | 0.8346942   | 406 | 0.941601 |
| YPR145W_1772615_at   | -> Aspartic_acid.2        | 0.0477882  | 0.8409847   | 407 | 0.944064 |
| YBR001C_1776046_at   | -> Glucose.8              | 0.04777856 | 0.84100039  | 408 | 0.944064 |
| Succinic_acid.4      | -> YDR178W_1772220_at     | 0.0461651  | 0.843653    | 409 | 0.944267 |
| YER065C_1779905_at   | -> Succinic_acid.15       | 0.04307969 | 0.8488662   | 410 | 0.944267 |
| Aspartic_acid.9      | -> YPL104W_1776799_at     | 0.04211084 | 0.8505437   | 411 | 0.944267 |
| Ribose.5.phosphate.6 | -> YKL127W_1777971_at     | 0.04135893 | 0.8518596   | 412 | 0.944267 |
| YJR148W_1777344_at.1 | -> Isoleucine.1           | 0.04047691 | 0.8534195   | 413 | 0.944267 |
| YKL085W_1769857_at   | -> Malic_acid             | 0.04040272 | 0.85355147  | 414 | 0.944267 |
| YOR335C_1776171_at   | -> Alanine.3              | 0.03709607 | 0.8595706   | 415 | 0.944789 |
| Glycine.6            | -> YOL049W_1778316_at     | 0.03676276 | 0.8601927   | 416 | 0.944789 |
| Asparagine.4         | -> YLR155C_1777566_s_at.1 | 0.03598647 | 0.8616531   | 417 | 0.944789 |
| YOL061W_1770747_at   | -> Ribose.5.phosphate.1   | 0.03549839 | 0.8625798   | 418 | 0.944789 |
| Fructose.6           | -> YDL246C_1777143_s_at   | 0.03458212 | 0.8643376   | 419 | 0.944789 |
| YOL126C_1774081_at   | -> Malic_acid.2           | 0.0330648  | 0.867302985 | 420 | 0.945212 |
| YLR155C_1777566_s_at | -> Aspartic_acid.10       | 0.03228607 | 0.8688525   | 421 | 0.945212 |
| Fumaric_acid.5       | -> YMR118C_1773702_at.1   | 0.02934224 | 0.8748935   | 422 | 0.949488 |
| YPL097W_1770460_at   | -> Tyrosine               | 0.02838323 | 0.876929    | 423 | 0.949488 |
| Succinic_acid        | -> YLL058W_1770340_at     | 0.02709385 | 0.8797228   | 424 | 0.950267 |
| Glycine.3            | -> YDR232W_1775965_at     | 0.0253725  | 0.8835622   | 425 | 0.952168 |
| Succinic_acid.8      | -> YBR006W_1775744_at     | 0.02402108 | 0.8866718   | 426 | 0.953276 |
| Aspartic_acid.5      | -> YMR250W_1774495_at     | 0.02247042 | 0.8903533   | 427 | 0.954993 |

|                        |                           |             |            |     |          |
|------------------------|---------------------------|-------------|------------|-----|----------|
| YNL220W_1778156_at     | -> Aspartic_acid.11       | 0.02065939  | 0.8948227  | 428 | 0.956084 |
| YGR208W_1771458_at     | -> Serine.3               | 0.01934129  | 0.8982036  | 429 | 0.956084 |
| YJL101C_1777080_at     | -> Glutamic_acid.28       | 0.01774002  | 0.9024741  | 430 | 0.956084 |
| YKL106W_1776650_at     | -> Aspartic_acid.8        | 0.01765153  | 0.9027157  | 431 | 0.956084 |
| YNR050C_1772003_at     | -> Glutamic_acid.4        | 0.01724923  | 0.9038222  | 432 | 0.956084 |
| YDR023W_1776877_at     | -> Serine.9               | 0.0172224   | 0.90389642 | 433 | 0.956084 |
| YER052C_1772562_at     | -> Aspartic_acid.1        | 0.01615839  | 0.9068905  | 434 | 0.957041 |
| Glutamic_acid.35       | -> YHR208W_1779000_at.3   | 0.01503758  | 0.9101555  | 435 | 0.958279 |
| Glycerol.4             | -> YER062C_1778996_at     | 0.01281647  | 0.917015   | 436 | 0.962818 |
| Succinic_acid.3        | -> YKL148C_1772202_at     | 0.01197938  | 0.9197559  | 437 | 0.962818 |
| Ribose.5.phosphate.7   | -> YBR117C_1778142_at     | 0.01165465  | 0.9208453  | 438 | 0.962818 |
| YLR438W_1775480_at     | -> Glutamic_acid.21       | 0.01106156  | 0.9228755  | 439 | 0.962818 |
| Aspartic_acid.7        | -> YLL018C_1776523_at     | 0.008852583 | 0.930971   | 440 | 0.967143 |
| YFL030W_1770767_at     | -> Glycine                | 0.00878233  | 0.9312444  | 441 | 0.967143 |
| YMR113W_1775174_at     | -> Glutamic_acid.19       | 0.008026826 | 0.9342572  | 442 | 0.968076 |
| YBR263W_1774806_at.1   | -> Glycine.2              | 0.006731453 | 0.939778   | 443 | 0.969384 |
| Glutamic_acid.27       | -> YDL171C_1776998_at     | 0.005979874 | 0.94323    | 444 | 0.969384 |
| Glycine                | -> YFL030W_1770767_at     | 0.0059302   | 0.9434656  | 445 | 0.969384 |
| YGL253W_1770167_at     | -> Fructose               | 0.005462506 | 0.94573513 | 446 | 0.969384 |
| Aspartic_acid.10       | -> YLR155C_1777566_s_at   | 0.00517173  | 0.9471958  | 447 | 0.969384 |
| Malic_acid.1           | -> YPL262W_1770087_at.1   | 0.004972933 | 0.9482183  | 448 | 0.969384 |
| YAR015W_1774134_at     | -> Aspartic_acid.3        | 0.004045473 | 0.9532863  | 449 | 0.972141 |
| YJR139C_1769510_at     | -> Threonine              | 0.003726914 | 0.9551601  | 450 | 0.972141 |
| YOR095C_1779097_at     | -> Ribose.5.phosphate.10  | 0.001700895 | 0.96969431 | 451 | 0.984745 |
| YKL141W_1777334_at.1   | -> Fumaric_acid.8         | 0.001349203 | 0.9730066  | 452 | 0.985923 |
| YNL241C_1776427_at     | -> Glucose.6.phosphate.5  | 0.000776359 | 0.97952113 | 453 | 0.987402 |
| YFR053C_1775976_at.2   | -> Fructose.6.phosphate.5 | 0.000731494 | 0.9801215  | 454 | 0.987402 |
| Threonine.2            | -> YEL046C_1772625_at.1   | 0.000672849 | 0.9809347  | 455 | 0.987402 |
| YPR074C_1778503_at.1   | -> Fructose.6.phosphate.8 | 0.000424104 | 0.9848628  | 456 | 0.987964 |
| Fructose.6.phosphate.9 | -> YKL104C_1778809_at.1   | 0.000372848 | 0.98580683 | 457 | 0.987964 |
| Glucose.6.phosphate.6  | -> YJL153C_1779129_at     | 9.66E-05    | 0.99277523 | 458 | 0.992775 |

**Heat Stress**

| <b>Cause</b>                | <b>Effect</b>                   | <b>F-test</b> | <b>p-value</b> | <b>Rank</b> | <b>BH-correct lag=1</b> |
|-----------------------------|---------------------------------|---------------|----------------|-------------|-------------------------|
| Phenylalanine               | -> YPR047W_1773228_at           | 346.7245713   | 0.000338067    | 1           | 0.081362                |
| YLR155C_1777566_s_at        | -> Aspartic_acid.10             | 339.26973     | 0.000349192    | 2           | 0.081362                |
| Adenosine.5.monophosphate.9 | -> YBR115C_1775044_at           | 1.29E+02      | 0.001464905    | 3           | 0.227549                |
| Serine.12                   | -> YGL026C_1779478_at           | 92.8090474    | 0.002374055    | 4           | 0.276577                |
| Glutamic_acid.8             | -> YHR037W_1773117_at           | 63.87250813   | 0.00408835     | 5           | 0.312273                |
| Valine.1                    | -> YHR208W_1779000_at.2         | 50.0899758    | 0.005800695    | 6           | 0.312273                |
| Glutamic_acid.30            | -> YJR148W_1777344_at.3         | 45.9289363    | 0.00656608     | 7           | 0.312273                |
| Glutamic_acid.5             | -> YOL140W_1772375_at           | 45.5591875    | 0.006642195    | 8           | 0.312273                |
| Glutamic_acid.7             | -> YPR145W_1772615_at.1         | 42.1239495    | 0.007425965    | 9           | 0.312273                |
| Succinic_acid.6             | -> YJL045W_1774888_at           | 41.23477      | 0.007654233    | 10          | 0.312273                |
| YLR142W_1775678_at          | -> Proline.1                    | 37.179835     | 0.008860922    | 11          | 0.312273                |
| Glutamine.8                 | -> YER090W_1776841_at           | 37.033517     | 0.00891032     | 12          | 0.312273                |
| YLL041C_1777010_at.1        | -> Fumaric_acid.7               | 35.362497     | 0.00950869     | 13          | 0.312273                |
| YPR006C_1770947_at          | -> Succinic_acid.1              | 32.802559     | 0.01056543     | 14          | 0.312273                |
| Proline                     | -> YHR020W_1774658_at           | 31.3091986    | 0.01127591     | 15          | 0.312273                |
| Serine.4                    | -> YBR263W_1774806_at           | 30.86414      | 0.01150318     | 16          | 0.312273                |
| Valine                      | -> YJR148W_1777344_at.2         | 28.0643676    | 0.01312669     | 17          | 0.312273                |
| YDR074W_1776531_at          | -> Trehalose.2                  | 28.03803      | 0.01314375     | 18          | 0.312273                |
| Trehalose.3                 | -> YPR026W_1777053_at.1         | 25.91543      | 0.01465105     | 19          | 0.312273                |
| Adenosine.5.monophosphate.4 | -> YOL064C_1771215_at           | 25.50235546   | 0.01497805     | 20          | 0.312273                |
| Glutamic_acid.3             | -> YKL132C_1769938_at           | 25.1996759    | 0.01522546     | 21          | 0.312273                |
| Threonine.1                 | -> YKL194C_1769828_at           | 24.683066     | 0.01566382     | 22          | 0.312273                |
| Aspartic_acid.6             | -> YDR321W_1775295_at           | 24.44419355   | 0.01587367     | 23          | 0.312273                |
| Trehalose.1                 | -> YBR001C_1776046_at.1         | 24.21144      | 0.01608271     | 24          | 0.312273                |
| Glutamic_acid.10            | -> YDR300C_1773540_at           | 22.542968     | 0.01772592     | 25          | 0.315978                |
| YDR001C_1770456_at.1        | -> Trehalose                    | 22.08267      | 0.01822907     | 26          | 0.315978                |
| YER099C_1779140_at.1        | -> Adenosine.5.monophosphate.21 | 2.20E+01      | 0.01830773     | 27          | 0.315978                |
| Glutamic_acid.35            | -> YHR208W_1779000_at.3         | 19.809059     | 0.02110502     | 28          | 0.351248                |
| Isoleucine.3                | -> YBL076C_1779139_at           | 18.537658     | 0.0230611      | 29          | 0.3654                  |
| Aspartic_acid.2             | -> YPR145W_1772615_at           | 17.9617667    | 0.02404896     | 30          | 0.3654                  |
| Glutamine.11                | -> YKL104C_1778809_at.1         | 17.8174009    | 0.0243077      | 31          | 0.3654                  |

|                              |                         |             |             |    |          |
|------------------------------|-------------------------|-------------|-------------|----|----------|
| YFR053C_1775976_at           | -> Fructose.5           | 16.90883    | 0.02604854  | 32 | 0.379332 |
| Threonine.4                  | -> YER086W_1776603_at.1 | 15.94795218 | 0.02812811  | 33 | 0.397203 |
| Glutamic_acid.21             | -> YLR438W_1775480_at   | 15.1569201  | 0.03005726  | 34 | 0.404883 |
| Glucose.6                    | -> YBR184W_1775738_at   | 14.51784049 | 0.03178309  | 35 | 0.404883 |
| Trehalose.2                  | -> YDR074W_1776531_at   | 14.4144     | 0.03207801  | 36 | 0.404883 |
| Phenylalanine.3              | -> YKL106W_1776650_at.2 | 14.1844507  | 0.0327502   | 37 | 0.404883 |
| Alanine.3                    | -> YOR335C_1776171_at   | 14.095624   | 0.03301619  | 38 | 0.404883 |
| Alanine.1                    | -> YFL030W_1770767_at.1 | 13.54761512 | 0.03474011  | 39 | 0.4151   |
| Threonine.2                  | -> YEL046C_1772625_at.1 | 13.033402   | 0.036499    | 40 | 0.418856 |
| Glutamic_acid.37             | -> YMR217W_1779734_at   | 12.08695    | 0.04015309  | 41 | 0.418856 |
| Proline.3                    | -> YER023W_1778412_at   | 11.984951   | 0.04058328  | 42 | 0.418856 |
| Glutamine.2                  | -> YPR145W_1772615_at.3 | 11.965996   | 0.04066407  | 43 | 0.418856 |
| Aspartic_acid.10             | -> YLR155C_1777566_s_at | 11.88493    | 0.041012663 | 44 | 0.418856 |
| Isoleucine.1                 | -> YJR148W_1777344_at.1 | 11.523407   | 0.04262982  | 45 | 0.418856 |
| Homoserine.1                 | -> YHR025W_1777312_at   | 11.281578   | 0.04377203  | 46 | 0.418856 |
| YDR321W_1775295_at.1         | -> Asparagine.2         | 11.280736   | 0.0437761   | 47 | 0.418856 |
| YPR026W_1777053_at.1         | -> Trehalose.3          | 11.22057    | 0.04406828  | 48 | 0.418856 |
| YBR263W_1774806_at           | -> Serine.4             | 11.20687    | 0.04413525  | 49 | 0.418856 |
| Threonine.3                  | -> YIL078W_1774604_at   | 10.83959285 | 0.04599661  | 50 | 0.418856 |
| Isoleucine.2                 | -> YHR208W_1779000_at.1 | 10.6019632  | 0.04727201  | 51 | 0.418856 |
| Adenosine.5.monophosphate.13 | -> YHL011C_1776097_at.1 | 10.5723336  | 0.04743518  | 52 | 0.418856 |
| Fructose.5                   | -> YFR053C_1775976_at   | 10.35104    | 0.04868423  | 53 | 0.418856 |
| YBR001C_1776046_at.1         | -> Trehalose.1          | 10.28717    | 0.049055    | 54 | 0.418856 |
| YKL141W_1777334_at.1         | -> Fumaric_acid.8       | 10.083694   | 0.0502682   | 55 | 0.418856 |
| Fructose.4                   | -> YIL172C_1775391_s_at | 9.9345209   | 0.05118989  | 56 | 0.418856 |
| Glutamic_acid.36             | -> YJL130C_1779682_at   | 9.93E+00    | 0.0512334   | 57 | 0.418856 |
| Serine.1                     | -> YDR062W_1770116_at   | 9.76046     | 0.05230161  | 58 | 0.420216 |
| Serine.7                     | -> YER086W_1776603_at   | 9.124949665 | 0.05672522  | 59 | 0.448033 |
| YPL111W_1778654_at           | -> Arginine.3           | 8.933028712 | 0.05818555  | 60 | 0.451908 |
| Serine.9                     | -> YDR023W_1776877_at   | 8.6680956   | 0.06030747  | 61 | 0.459246 |
| YJL045W_1774888_at           | -> Succinic_acid.6      | 8.47161     | 0.061966299 | 62 | 0.459246 |
| Glutamine.12                 | -> YJL130C_1779682_at.1 | 8.085059    | 0.06546191  | 63 | 0.459246 |
| YPR145W_1772615_at.2         | -> Asparagine.1         | 8.078807    | 0.06552115  | 64 | 0.459246 |



|                              |                           |             |            |    |          |
|------------------------------|---------------------------|-------------|------------|----|----------|
| YLR027C_1774241_at.2         | -> Phenylalanine.1        | 8.073152    | 0.0655748  | 65 | 0.459246 |
| Glutamic_acid.15             | -> YPR035W_1774425_at     | 8.026844    | 0.06601699 | 66 | 0.459246 |
| YBR006W_1775744_at           | -> Succinic_acid.8        | 8.025605    | 0.06602888 | 67 | 0.459246 |
| Glutamic_acid.26             | -> YKL106W_1776650_at.1   | 7.90778088  | 0.06717711 | 68 | 0.460361 |
| Phenylalanine.6              | -> YFL022C_1779336_at     | 7.6553558   | 0.06975283 | 69 | 0.462765 |
| YLR164W_1779688_at.1         | -> Fumaric_acid.11        | 7.4980583   | 0.07144282 | 70 | 0.462765 |
| YPR035W_1774425_at.1         | -> Glutamine.5            | 7.457291    | 0.07189204 | 71 | 0.462765 |
| Proline.2                    | -> YER087W_1776689_at     | 7.440726    | 0.07207594 | 72 | 0.462765 |
| YBR111C_1771955_at           | -> Ribose.5.phosphate.3   | 7.4033911   | 0.07249329 | 73 | 0.462765 |
| Glucose.7                    | -> YFR053C_1775976_at.1   | 7.285681    | 0.07383604 | 74 | 0.464967 |
| Alanine.4                    | -> YDR111C_1778563_at     | 6.996863    | 0.07731353 | 75 | 0.475448 |
| YFR053C_1775976_at.1         | -> Glucose.7              | 6.894824    | 0.07860833 | 76 | 0.475448 |
| YOR184W_1774801_at           | -> Glutamic_acid.18       | 6.7839986   | 0.08005636 | 77 | 0.475448 |
| YAL062W_1772549_at           | -> Glutamic_acid.6        | 6.762102    | 0.08034776 | 78 | 0.475448 |
| YPR026W_1777053_at           | -> Glucose.9              | 6.701863    | 0.08115867 | 79 | 0.475448 |
| Glutamic_acid.19             | -> YMR113W_1775174_at     | 6.66789879  | 0.08162195 | 80 | 0.475448 |
| Glutamine.14                 | -> YGR061C_1780004_at.1   | 6.5622854   | 0.08309132 | 81 | 0.478032 |
| Glutamic_acid.16             | -> YMR250W_1774495_at.1   | 6.091566    | 0.09021556 | 82 | 0.485319 |
| Glutamine.3                  | -> YOR168W_1772939_at     | 6.0773913   | 0.0904459  | 83 | 0.485319 |
| Serine.3                     | -> YGR208W_1771458_at     | 6.064023    | 0.09066404 | 84 | 0.485319 |
| Glutamic_acid.14             | -> YLR027C_1774241_at.1   | 6.041045    | 0.09104106 | 85 | 0.485319 |
| YDR516C_1770001_at           | -> Glucose                | 6.031445    | 0.09119936 | 86 | 0.485319 |
| YER099C_1779140_at           | -> Ribose.5.phosphate.11  | 6.0065412   | 0.09161216 | 87 | 0.485319 |
| YHR018C_1772287_at.1         | -> Arginine               | 5.8951396   | 0.09349784 | 88 | 0.485319 |
| Adenosine.5.monophosphate.22 | -> YDL141W_1779304_at     | 5.86E+00    | 0.09410607 | 89 | 0.485319 |
| YMR118C_1773702_at           | -> Succinic_acid.5        | 5.764815    | 0.09578806 | 90 | 0.485319 |
| Glutamic_acid.23             | -> YMR300C_1775736_at     | 5.653269    | 0.0978243  | 91 | 0.485319 |
| Glutamic_acid.32             | -> YDR111C_1778563_at.1   | 5.608258    | 0.09866666 | 92 | 0.485319 |
| Glutamic_acid.13             | -> YGR019W_1774010_at     | 5.503377898 | 0.1006775  | 93 | 0.485319 |
| Adenosine.5.monophosphate.5  | -> YBR111C_1771955_at.1   | 5.470039    | 0.1013313  | 94 | 0.485319 |
| YBR299W_1774491_s_at         | -> Fructose.3             | 5.4582102   | 0.1015649  | 95 | 0.485319 |
| Asparagine.4                 | -> YLR155C_1777566_s_at.1 | 5.425319    | 0.1022194  | 96 | 0.485319 |
| Aspartic_acid.4              | -> YLR027C_1774241_at     | 5.376441605 | 0.1032052  | 97 | 0.485319 |

|                              |                         |             |            |     |          |
|------------------------------|-------------------------|-------------|------------|-----|----------|
| Glutamic_acid.6              | -> YAL062W_1772549_at   | 5.334618    | 0.10406156 | 98  | 0.485319 |
| Glutamic_acid.24             | -> YGL245W_1776080_at   | 5.330842    | 0.1041394  | 99  | 0.485319 |
| Adenosine.5.monophosphate.11 | -> YLR153C_1775276_at   | 5.33054     | 0.1041457  | 100 | 0.485319 |
| Trehalose                    | -> YDR001C_1770456_at.1 | 5.2787      | 0.1052253  | 101 | 0.485495 |
| YER065C_1779905_at           | -> Succinic_acid.15     | 5.2246014   | 0.1063722  | 102 | 0.485975 |
| Adenosine.5.monophosphate.1  | -> YOL061W_1770747_at.1 | 5.129832    | 0.1084328  | 103 | 0.490579 |
| Glutamic_acid.25             | -> YMR062C_1776272_at   | 4.829517    | 0.1154289  | 104 | 0.51721  |
| Aspartic_acid.9              | -> YPL104W_1776799_at   | 4.6514062   | 0.1199466  | 105 | 0.519954 |
| Aspartic_acid.5              | -> YMR250W_1774495_at   | 4.6056552   | 0.1211554  | 106 | 0.519954 |
| YJR109C_1777097_at.1         | -> Glutamine.10         | 4.5576438   | 0.1224463  | 107 | 0.519954 |
| Glutamine.13                 | -> YMR217W_1779734_at.1 | 4.549457    | 0.1226687  | 108 | 0.519954 |
| Glycine.5                    | -> YGL234W_1778252_at   | 4.507111    | 0.1238302  | 109 | 0.519954 |
| Aspartic_acid.8              | -> YKL106W_1776650_at   | 4.4888331   | 0.1243373  | 110 | 0.519954 |
| YGL245W_1776080_at           | -> Glutamic_acid.24     | 4.479266    | 0.1246041  | 111 | 0.519954 |
| Malic_acid.3                 | -> YKL029C_1776811_at   | 4.427156676 | 0.1260746  | 112 | 0.519954 |
| YMR250W_1774495_at.1         | -> Glutamic_acid.16     | 4.426852    | 0.12608332 | 113 | 0.519954 |
| YLR304C_1778035_at           | -> Citric_acid.2        | 4.314286    | 0.1293623  | 114 | 0.524473 |
| YDR111C_1778563_at.1         | -> Glutamic_acid.32     | 4.312015    | 0.12942997 | 115 | 0.524473 |
| Succinic_acid.9              | -> YLL041C_1777010_at   | 4.211369    | 0.1324886  | 116 | 0.526645 |
| Lysine.2                     | -> YDR037W_1779238_at   | 4.198867    | 0.1328771  | 117 | 0.526645 |
| YGR124W_1769642_at.3         | -> Glutamine            | 4.1212667   | 0.1353322  | 118 | 0.526645 |
| Homoserine                   | -> YJR139C_1769510_at.1 | 4.073014866 | 0.1368978  | 119 | 0.526645 |
| Leucine.2                    | -> YJR148W_1777344_at   | 4.0575999   | 0.1374044  | 120 | 0.526645 |
| YNL277W_1779413_at           | -> Homoserine.2         | 4.055808    | 0.1374635  | 121 | 0.526645 |
| Citric_acid.2                | -> YLR304C_1778035_at   | 4.043306    | 0.1378771  | 122 | 0.526645 |
| YER090W_1776841_at           | -> Glutamine.8          | 3.973459    | 0.14022675 | 123 | 0.52774  |
| Glucose.9                    | -> YPR026W_1777053_at   | 3.96755     | 0.14042867 | 124 | 0.52774  |
| Asparagine.2                 | -> YDR321W_1775295_at.1 | 3.891687    | 0.1430652  | 125 | 0.533347 |
| Glutamic_acid.33             | -> YKL104C_1778809_at   | 3.80704619  | 0.1461073  | 126 | 0.538735 |
| Glutamic_acid.29             | -> YJR109C_1777097_at   | 3.786377    | 0.1468669  | 127 | 0.538735 |
| YER023W_1778412_at           | -> Proline.3            | 3.69263     | 0.1503979  | 128 | 0.538735 |
| Asparagine.1                 | -> YPR145W_1772615_at.2 | 3.684028    | 0.15072911 | 129 | 0.538735 |
| Glutamic_acid.38             | -> YGR061C_1780004_at   | 3.672153    | 0.1511884  | 130 | 0.538735 |

|                              |                         |             |            |     |          |
|------------------------------|-------------------------|-------------|------------|-----|----------|
| Glutamic_acid.27             | -> YDL171C_1776998_at   | 3.66549437  | 0.151447   | 131 | 0.538735 |
| Glycine.1                    | -> YEL046C_1772625_at   | 3.57427382  | 0.1550665  | 132 | 0.546394 |
| YKL127W_1777971_at           | -> Ribose.5.phosphate.6 | 3.5526718   | 0.1559452  | 133 | 0.546394 |
| YNL316C_1777156_at           | -> Phenylalanine.4      | 3.4377046   | 0.1607679  | 134 | 0.558421 |
| YLR299W_1769870_at           | -> Glutamic_acid.2      | 3.40047     | 0.1623845  | 135 | 0.558421 |
| Fumaric_acid.7               | -> YLL041C_1777010_at.1 | 3.387078    | 0.16297271 | 136 | 0.558421 |
| Adenosine.5.monophosphate.20 | -> YOR360C_1778594_at   | 3.245211947 | 0.1694342  | 137 | 0.576324 |
| YDR178W_1772220_at           | -> Succinic_acid.4      | 3.185382    | 0.1722916  | 138 | 0.581796 |
| Glutamine.6                  | -> YHR074W_1775518_at.1 | 3.1242312   | 0.1752982  | 139 | 0.587457 |
| Glutamine.5                  | -> YPR035W_1774425_at.1 | 3.08396     | 0.17732752 | 140 | 0.587457 |
| Adenosine.5.monophosphate.14 | -> YDR399W_1776262_at   | 3.075675893 | 0.17775    | 141 | 0.587457 |
| Glutamic_acid.4              | -> YNR050C_1772003_at   | 3.0381636   | 0.1796846  | 142 | 0.588122 |
| YEL047C_1771840_at           | -> Succinic_acid.2      | 3.00E+00    | 0.1819548  | 143 | 0.588122 |
| Adenosine.5.monophosphate.21 | -> YER099C_1779140_at.1 | 2.98E+00    | 0.18264153 | 144 | 0.588122 |
| Glycine.4                    | -> YLR058C_1776401_at.1 | 2.975474    | 0.1829993  | 145 | 0.588122 |
| YDR232W_1775965_at           | -> Glycine.3            | 2.93023358  | 0.185457   | 146 | 0.590002 |
| Alanine.2                    | -> YLR231C_1771376_at   | 2.890668    | 0.1876532  | 147 | 0.590002 |
| YJR051W_1778330_at           | -> Succinic_acid.13     | 2.88222975  | 0.1881273  | 148 | 0.590002 |
| Glutamine.7                  | -> YMR300C_1775736_at.1 | 2.872993    | 0.1886487  | 149 | 0.590002 |
| YBR263W_1774806_at.1         | -> Glycine.2            | 2.786799    | 0.1936363  | 150 | 0.592857 |
| Adenosine.5.monophosphate.6  | -> YML022W_1771956_at   | 2.7560863   | 0.1954684  | 151 | 0.592857 |
| YJR148W_1777344_at.1         | -> Isoleucine.1         | 2.751381    | 0.19575176 | 152 | 0.592857 |
| Serine.8                     | -> YMR296C_1776857_at   | 2.731054    | 0.1969839  | 153 | 0.592857 |
| YOR303W_1773884_at.1         | -> Glutamine.4          | 2.7286015   | 0.1971334  | 154 | 0.592857 |
| Fructose.6                   | -> YDL246C_1777143_s_at | 2.7275963   | 0.1971948  | 155 | 0.592857 |
| Succinic_acid.5              | -> YMR118C_1773702_at   | 2.617689    | 0.20410737 | 156 | 0.606158 |
| YLR058C_1776401_at.1         | -> Glycine.4            | 2.611596    | 0.2045028  | 157 | 0.606158 |
| YEL047C_1771840_at.1         | -> Fumaric_acid.1       | 2.595993    | 0.2055214  | 158 | 0.606158 |
| YKL211C_1769851_at           | -> Glutamine.1          | 2.5274442   | 0.2101019  | 159 | 0.609445 |
| Threonine.5                  | -> YCL064C_1778479_at.1 | 2.5161355   | 0.2108745  | 160 | 0.609445 |
| Succinic_acid.1              | -> YPR006C_1770947_at   | 2.504426    | 0.21167971 | 161 | 0.609445 |
| Aspartic_acid.1              | -> YER052C_1772562_at   | 2.4827989   | 0.2131809  | 162 | 0.609445 |
| YJR051W_1778330_at.1         | -> Fumaric_acid.10      | 2.4477463   | 0.2156534  | 163 | 0.609445 |

|                      |                                 |            |            |     |          |
|----------------------|---------------------------------|------------|------------|-----|----------|
| Glucose.8            | -> YBR001C_1776046_at           | 2.435975   | 0.2164949  | 164 | 0.609445 |
| Succinic_acid.4      | -> YDR178W_1772220_at           | 2.418296   | 0.2177693  | 165 | 0.609445 |
| Glutamic_acid.34     | -> YOR375C_1778816_at           | 2.409883   | 0.2183804  | 166 | 0.609445 |
| Threonine            | -> YJR139C_1769510_at           | 2.399709   | 0.2191233  | 167 | 0.609445 |
| Valine.2             | -> YGR094W_1780055_at           | 2.3916603  | 0.2197142  | 168 | 0.609445 |
| Malic_acid.1         | -> YPL262W_1770087_at.1         | 2.36098095 | 0.2219919  | 169 | 0.61212  |
| Glutamic_acid.9      | -> YDL215C_1773457_at           | 2.335776   | 0.223894   | 170 | 0.613733 |
| Fructose             | -> YGL253W_1770167_at           | 2.295647   | 0.2269812  | 171 | 0.618557 |
| Phenylalanine.1      | -> YLR027C_1774241_at.2         | 2.226895   | 0.2324455  | 172 | 0.629765 |
| YHL011C_1776097_at   | -> Ribose.5.phosphate.4         | 2.1839282  | 0.2359778  | 173 | 0.63564  |
| YBR001C_1776046_at   | -> Glucose.8                    | 2.16745    | 0.2373574  | 174 | 0.635681 |
| Citric_acid          | -> YJL200C_1769943_at           | 2.1461704  | 0.2391598  | 175 | 0.636848 |
| YDR341C_1773272_at   | -> Arginine.1                   | 2.091664   | 0.2438873  | 176 | 0.637916 |
| Glucose.11           | -> YCL040W_1779150_at           | 2.0700139  | 0.2458105  | 177 | 0.637916 |
| Serine.10            | -> YCL064C_1778479_at           | 2.0680227  | 0.2459887  | 178 | 0.637916 |
| YER087W_1776689_at   | -> Proline.2                    | 2.060575   | 0.24665734 | 179 | 0.637916 |
| YGL067W_1776299_at   | -> Adenosine.5.monophosphate.15 | 2.03273474 | 0.249185   | 180 | 0.637916 |
| YLR231C_1771376_at   | -> Alanine.2                    | 2.024051   | 0.2499826  | 181 | 0.637916 |
| Fumaric_acid.1       | -> YEL047C_1771840_at.1         | 2.021442   | 0.2502232  | 182 | 0.637916 |
| Aspartic_acid.11     | -> YNL220W_1778156_at           | 2.018313   | 0.2505122  | 183 | 0.637916 |
| YGR287C_1770859_at.1 | -> Glucose.3                    | 1.956752   | 0.2563196  | 184 | 0.644172 |
| Glucose.5            | -> YIL172C_1775391_s_at.1       | 1.956332   | 0.25636    | 185 | 0.644172 |
| YAR015W_1774134_at   | -> Aspartic_acid.3              | 1.9485031  | 0.2571157  | 186 | 0.644172 |
| Leucine.3            | -> YHR208W_1779000_at           | 1.88331216 | 0.2635634  | 187 | 0.649988 |
| YCR036W_1769967_at   | -> Ribose.5.phosphate           | 1.8748446  | 0.2644218  | 188 | 0.649988 |
| YOR335C_1776171_at   | -> Alanine.3                    | 1.84871    | 0.26710246 | 189 | 0.649988 |
| Glutamic_acid.31     | -> YOR241W_1778173_at           | 1.8467529  | 0.2673051  | 190 | 0.649988 |
| Succinic_acid.3      | -> YKL148C_1772202_at           | 1.840833   | 0.2679198  | 191 | 0.649988 |
| YDR062W_1770116_at   | -> Serine.1                     | 1.836865   | 0.26833313 | 192 | 0.649988 |
| YHR025W_1777312_at   | -> Homoserine.1                 | 1.827803   | 0.26928156 | 193 | 0.649988 |
| Leucine.1            | -> YPL160W_1776027_at           | 1.8153369  | 0.2705958  | 194 | 0.649988 |
| YGR155W_1775526_at   | -> Serine.5                     | 1.73386    | 0.2794727  | 195 | 0.667868 |
| Fructose.7           | -> YJL216C_1778617_at           | 1.67312909 | 0.2864312  | 196 | 0.677413 |

|                              |                                |             |             |     |          |
|------------------------------|--------------------------------|-------------|-------------|-----|----------|
| Glucose                      | -> YDR516C_1770001_at          | 1.634658    | 0.29100022  | 197 | 0.677413 |
| YDR111C_1778563_at           | -> Alanine.4                   | 1.628561    | 0.29173631  | 198 | 0.677413 |
| YBR111C_1771955_at.1         | -> Adenosine.5.monophosphate.5 | 1.599898    | 0.2952415   | 199 | 0.677413 |
| Adenosine.5.monophosphate.2  | -> YBL068W_1770750_at.1        | 1.5966008   | 0.2956496   | 200 | 0.677413 |
| YHR208W_1779000_at.3         | -> Glutamic_acid.35            | 1.582321    | 0.29742839  | 201 | 0.677413 |
| YGL253W_1770167_at           | -> Fructose                    | 1.578364    | 0.2979248   | 202 | 0.677413 |
| Adenosine.5.monophosphate.16 | -> YKL181W_1776342_at.1        | 1.57E+00    | 0.2986405   | 203 | 0.677413 |
| YEL046C_1772625_at.1         | -> Threonine.2                 | 1.572456    | 0.2986686   | 204 | 0.677413 |
| YOR095C_1779097_at           | -> Ribose.5.phosphate.10       | 1.560698683 | 0.3001586   | 205 | 0.677413 |
| Proline.1                    | -> YLR142W_1775678_at          | 1.514079    | 0.306200421 | 206 | 0.677413 |
| YBL076C_1779139_at           | -> Isoleucine.3                | 1.505131    | 0.30738496  | 207 | 0.677413 |
| Fructose.2                   | -> YGR287C_1770859_at          | 1.48E+00    | 0.3105123   | 208 | 0.677413 |
| YGR208W_1771458_at           | -> Serine.3                    | 1.477541    | 0.31108997  | 209 | 0.677413 |
| Serine.5                     | -> YGR155W_1775526_at          | 1.476035    | 0.3112945   | 210 | 0.677413 |
| Adenosine.5.monophosphate.17 | -> YOR143C_1777034_at          | 1.464963    | 0.3128059   | 211 | 0.677413 |
| YJR109C_1777097_at           | -> Glutamic_acid.29            | 1.447551    | 0.3152093   | 212 | 0.677413 |
| Succinic_acid.2              | -> YEL047C_1771840_at          | 1.445384    | 0.3155108   | 213 | 0.677413 |
| YGR061C_1780004_at           | -> Glutamic_acid.38            | 1.435307    | 0.3169196   | 214 | 0.677413 |
| YLR359W_1777563_at           | -> Fumaric_acid.9              | 1.433044    | 0.3172375   | 215 | 0.677413 |
| YLR027C_1774241_at.1         | -> Glutamic_acid.14            | 1.432387    | 0.31732999  | 216 | 0.677413 |
| YMR300C_1775736_at.1         | -> Glutamine.7                 | 1.431521    | 0.3174517   | 217 | 0.677413 |
| YKL148C_1772202_at           | -> Succinic_acid.3             | 1.42535     | 0.3183227   | 218 | 0.677413 |
| YBR299W_1774491_s_at.1       | -> Glucose.4                   | 1.42512171  | 0.318355    | 219 | 0.677413 |
| Aspartic_acid.7              | -> YLL018C_1776523_at          | 1.3961425   | 0.3225041   | 220 | 0.680858 |
| YDL171C_1776998_at.1         | -> Glutamine.9                 | 1.393439    | 0.3228963   | 221 | 0.680858 |
| Adenosine.5.monophosphate    | -> YML035C_1769339_at          | 1.3583425   | 0.3280654   | 222 | 0.685487 |
| YGR287C_1770859_at           | -> Fructose.2                  | 1.350933    | 0.3291759   | 223 | 0.685487 |
| YPR035W_1774425_at           | -> Glutamic_acid.15            | 1.348749    | 0.3295046   | 224 | 0.685487 |
| YJL216C_1778617_at.1         | -> Glucose.10                  | 1.3018392   | 0.3367104   | 225 | 0.691297 |
| Serine.2                     | -> YHR011W_1770696_at          | 1.2996315   | 0.3370566   | 226 | 0.691297 |
| Arginine.1                   | -> YDR341C_1773272_at          | 1.295739    | 0.3376685   | 227 | 0.691297 |
| YOR375C_1778816_at           | -> Glutamic_acid.34            | 1.292172    | 0.3382312   | 228 | 0.691297 |
| YDR001C_1770456_at           | -> Glucose.2                   | 1.238036    | 0.3469847   | 229 | 0.703122 |

|                      |                                 |             |             |     |          |
|----------------------|---------------------------------|-------------|-------------|-----|----------|
| YPR145W_1772615_at.3 | -> Glutamine.2                  | 1.237735    | 0.34703456  | 230 | 0.703122 |
| YMR217W_1779734_at.1 | -> Glutamine.13                 | 1.220043    | 0.3499867   | 231 | 0.706034 |
| YLL058W_1770340_at   | -> Succinic_acid                | 1.17208514  | 0.3582265   | 232 | 0.714997 |
| Succinic_acid.11     | -> YOR142W_1778018_at           | 1.16564374  | 0.3593605   | 233 | 0.714997 |
| YOR143C_1777034_at   | -> Adenosine.5.monophosphate.17 | 1.163304    | 0.359774    | 234 | 0.714997 |
| Citric_acid.1        | -> YGL205W_1776791_at           | 1.158830182 | 0.3605673   | 235 | 0.714997 |
| YDL215C_1773457_at   | -> Glutamic_acid.9              | 1.143858    | 0.3632458   | 236 | 0.715752 |
| Glycine.2            | -> YBR263W_1774806_at.1         | 1.13957     | 0.3640196   | 237 | 0.715752 |
| YMR300C_1775736_at   | -> Glutamic_acid.23             | 1.089509    | 0.3732866   | 238 | 0.727304 |
| YMR062C_1776272_at   | -> Glutamic_acid.25             | 1.087339    | 0.3736982   | 239 | 0.727304 |
| Glucose.3            | -> YGR287C_1770859_at.1         | 1.082328    | 0.374652    | 240 | 0.727304 |
| YLR153C_1775276_at   | -> Adenosine.5.monophosphate.11 | 1.073997    | 0.3762477   | 241 | 0.727304 |
| Glutamine.9          | -> YDL171C_1776998_at.1         | 1.06648     | 0.3776987   | 242 | 0.727304 |
| YJR139C_1769510_at   | -> Threonine                    | 1.048772    | 0.3811582   | 243 | 0.730945 |
| YMR296C_1776857_at   | -> Serine.8                     | 1.01091     | 0.3887587   | 244 | 0.738975 |
| Fumaric_acid.9       | -> YLR359W_1777563_at           | 0.994547    | 0.3921327   | 245 | 0.738975 |
| Leucine              | -> YLR382C_1773389_at           | 9.84E-01    | 0.3942537   | 246 | 0.738975 |
| Glutamic_acid.18     | -> YOR184W_1774801_at           | 0.9836332   | 0.39441396  | 247 | 0.738975 |
| Glutamic_acid.17     | -> YIL116W_1774739_at           | 0.9822829   | 0.394698    | 248 | 0.738975 |
| Serine               | -> YER026C_1769395_at           | 0.9798796   | 0.3952044   | 249 | 0.738975 |
| YGL253W_1770167_at.1 | -> Glucose.1                    | 0.9740123   | 0.3964459   | 250 | 0.738975 |
| YPR047W_1773228_at   | -> Phenylalanine                | 0.9576437   | 0.399949132 | 251 | 0.742459 |
| YOL061W_1770747_at   | -> Ribose.5.phosphate.1         | 0.95047771  | 0.4015014   | 252 | 0.742459 |
| Glutamic_acid.11     | -> YOR303W_1773884_at           | 0.917141849 | 0.4088763   | 253 | 0.747746 |
| Glutamic_acid.2      | -> YLR299W_1769870_at           | 0.9088583   | 0.4107492   | 254 | 0.747746 |
| YGR061C_1780004_at.1 | -> Glutamine.14                 | 0.8988465   | 0.41303502  | 255 | 0.747746 |
| Glutamine.10         | -> YJR109C_1777097_at.1         | 0.8935893   | 0.4142451   | 256 | 0.747746 |
| Glutamine.1          | -> YKL211C_1769851_at           | 0.8878468   | 0.4155748   | 257 | 0.747746 |
| YCL040W_1779150_at   | -> Glucose.11                   | 0.8837436   | 0.4165299   | 258 | 0.747746 |
| YER005W_1775020_at   | -> Adenosine.5.monophosphate.8  | 0.8829674   | 0.4167111   | 259 | 0.747746 |
| YAL054C_1772915_at   | -> Adenosine.5.monophosphate.7  | 0.8740744   | 0.4187975   | 260 | 0.747746 |
| YJR130C_1775462_at   | -> Succinic_acid.7              | 0.87405492  | 0.4188021   | 261 | 0.747746 |
| Glucose.2            | -> YDR001C_1770456_at           | 0.854258    | 0.4235202   | 262 | 0.7521   |

|                              |                                 |             |             |     |          |
|------------------------------|---------------------------------|-------------|-------------|-----|----------|
| Fructose.1                   | -> YIL162W_1770506_at           | 0.8459504   | 0.425531    | 263 | 0.7521   |
| YPL104W_1776799_at           | -> Aspartic_acid.9              | 0.8377141   | 0.4275428   | 264 | 0.7521   |
| YKL194C_1769828_at           | -> Threonine.1                  | 0.8310609   | 0.42918164  | 265 | 0.7521   |
| YOL140W_1772375_at           | -> Glutamic_acid.5              | 0.8253894   | 0.430588302 | 266 | 0.7521   |
| Glycine.6                    | -> YOL049W_1778316_at           | 0.824039778 | 0.4309244   | 267 | 0.7521   |
| YDR300C_1773540_at           | -> Glutamic_acid.10             | 0.812755    | 0.43375454  | 268 | 0.753289 |
| YFL022C_1779336_at           | -> Phenylalanine.6              | 0.8049213   | 0.43574073  | 269 | 0.753289 |
| YGL234W_1778252_at           | -> Glycine.5                    | 0.7964132   | 0.4379182   | 270 | 0.753289 |
| Glutamic_acid.12             | -> YJL071W_1773952_at           | 0.79581776  | 0.4380714   | 271 | 0.753289 |
| YDL078C_1778808_at           | -> Malic_acid.4                 | 0.782084    | 0.4416342   | 272 | 0.756623 |
| YMR105C_1778907_at           | -> Ribose.5.phosphate.9         | 0.7691907   | 0.4450314   | 273 | 0.759651 |
| YKL148C_1772202_at.1         | -> Fumaric_acid.2               | 0.7466465   | 0.4510976   | 274 | 0.767195 |
| YHR208W_1779000_at.1         | -> Isoleucine.2                 | 0.7390163   | 0.45318812  | 275 | 0.767948 |
| Fumaric_acid.5               | -> YMR118C_1773702_at.1         | 0.725006657 | 0.4570772   | 276 | 0.771732 |
| YKL181W_1776342_at.1         | -> Adenosine.5.monophosphate.16 | 0.7090666   | 0.4615844   | 277 | 0.776528 |
| YJL130C_1779682_at.1         | -> Glutamine.12                 | 0.6882882   | 0.46759561  | 278 | 0.778742 |
| Aspartic_acid.12             | -> YOL058W_1779309_at           | 0.6775589   | 0.470762    | 279 | 0.778742 |
| Arginine.2                   | -> YHR091C_1774813_at           | 0.676271313 | 0.4711449   | 280 | 0.778742 |
| Adenosine.5.monophosphate.19 | -> YGL248W_1777854_at           | 6.76E-01    | 0.4712313   | 281 | 0.778742 |
| Succinic_acid.8              | -> YBR006W_1775744_at           | 0.675898    | 0.47125607  | 282 | 0.778742 |
| Succinic_acid.10             | -> YKL141W_1777334_at           | 0.6673188   | 0.473825    | 283 | 0.780221 |
| YHR074W_1775518_at           | -> Glutamic_acid.22             | 0.64678     | 0.4800925   | 284 | 0.787325 |
| YPR074C_1778503_at           | -> Ribose.5.phosphate.8         | 0.6378866   | 0.4828594   | 285 | 0.787325 |
| YBL068W_1770750_at           | -> Ribose.5.phosphate.2         | 0.6326863   | 0.4844926   | 286 | 0.787325 |
| Homoserine.2                 | -> YNL277W_1779413_at           | 0.6314026   | 0.4848975   | 287 | 0.787325 |
| YCL064C_1778479_at.1         | -> Threonine.5                  | 0.6223782   | 0.4877638   | 288 | 0.789229 |
| Fumaric_acid.10              | -> YJR051W_1778330_at.1         | 0.6046147   | 0.4935096   | 289 | 0.795763 |
| Glutamic_acid.20             | -> YOL033W_1775445_at           | 0.59808064  | 0.4956587   | 290 | 0.796472 |
| YIL162W_1770506_at           | -> Fructose.1                   | 0.5830748   | 0.500669    | 291 | 0.801759 |
| Glutamine.4                  | -> YOR303W_1773884_at.1         | 0.5552819   | 0.5102363   | 292 | 0.814281 |
| Adenosine.5.monophosphate.10 | -> YDR441C_1775083_at           | 0.5491219   | 0.5124095   | 293 | 0.814958 |
| Lysine                       | -> YIR034C_1770279_at           | 0.5266813   | 0.5204966   | 294 | 0.820615 |
| YLR438W_1775480_at           | -> Glutamic_acid.21             | 0.5184659   | 0.5235263   | 295 | 0.820615 |

|                        |                                 |             |            |     |          |
|------------------------|---------------------------------|-------------|------------|-----|----------|
| YKL132C_1769938_at     | -> Glutamic_acid.3              | 0.5126726   | 0.52568581 | 296 | 0.820615 |
| Glutamic_acid.22       | -> YHR074W_1775518_at           | 0.5105032   | 0.5264995  | 297 | 0.820615 |
| Succinic_acid.12       | -> YGR244C_1778290_at           | 0.5067794   | 0.5279025  | 298 | 0.820615 |
| YJL200C_1769943_at     | -> Citric_acid                  | 0.5064463   | 0.5280284  | 299 | 0.820615 |
| YLL041C_1777010_at     | -> Succinic_acid.9              | 0.5037351   | 0.5290556  | 300 | 0.820615 |
| Serine.11              | -> YCL004W_1779004_at           | 0.498361524 | 0.5311043  | 301 | 0.820615 |
| Ribose.5.phosphate     | -> YCR036W_1769967_at           | 0.4940729   | 0.5327519  | 302 | 0.820615 |
| Glycine                | -> YFL030W_1770767_at           | 0.491939028 | 0.5335758  | 303 | 0.820615 |
| YPL040C_1776686_at     | -> Isoleucine                   | 0.4865292   | 0.5356773  | 304 | 0.821137 |
| Glucose.10             | -> YJL216C_1778617_at.1         | 0.4778025   | 0.539106   | 305 | 0.823683 |
| YML035C_1769339_at     | -> Adenosine.5.monophosphate    | 0.4507121   | 0.5500669  | 306 | 0.835631 |
| YLR155C_1777566_s_at.1 | -> Asparagine.4                 | 0.446092    | 0.5519862  | 307 | 0.835631 |
| YKL141W_1777334_at     | -> Succinic_acid.10             | 0.4453264   | 0.5523057  | 308 | 0.835631 |
| YER026C_1769395_at     | -> Serine                       | 0.4286692   | 0.5593623  | 309 | 0.843569 |
| YHR208W_1779000_at.2   | -> Valine.1                     | 0.4210768   | 0.56264727 | 310 | 0.843638 |
| YNL220W_1778156_at     | -> Aspartic_acid.11             | 0.420201    | 0.563029   | 311 | 0.843638 |
| YNL073W_1771061_at     | -> Lysine.1                     | 0.4050342   | 0.5697361  | 312 | 0.84869  |
| YOL058W_1779309_at     | -> Aspartic_acid.12             | 0.4043508   | 0.5700427  | 313 | 0.84869  |
| Ribose.5.phosphate.9   | -> YMR105C_1778907_at           | 0.3928263   | 0.5752707  | 314 | 0.851998 |
| YDR441C_1775083_at     | -> Adenosine.5.monophosphate.10 | 0.386487    | 0.5781946  | 315 | 0.851998 |
| Ribose.5.phosphate.2   | -> YBL068W_1770750_at           | 0.3823386   | 0.5801269  | 316 | 0.851998 |
| YHR074W_1775518_at.1   | -> Glutamine.6                  | 0.3808565   | 0.580821   | 317 | 0.851998 |
| YMR217W_1779734_at     | -> Glutamic_acid.37             | 0.37961     | 0.58140622 | 318 | 0.851998 |
| YJR148W_1777344_at.3   | -> Glutamic_acid.30             | 0.372964    | 0.58455024 | 319 | 0.85392  |
| Fumaric_acid.11        | -> YLR164W_1779688_at.1         | 0.3676828   | 0.58707761 | 320 | 0.854679 |
| Succinic_acid.14       | -> YLR164W_1779688_at           | 0.36024623  | 0.590681   | 321 | 0.854679 |
| YIL116W_1774739_at     | -> Glutamic_acid.17             | 0.3595991   | 0.5909971  | 322 | 0.854679 |
| Phenylalanine.2        | -> YIL116W_1774739_at.1         | 0.3547549   | 0.5933761  | 323 | 0.854679 |
| YJL101C_1777080_at     | -> Glutamic_acid.28             | 0.3500276   | 0.5957201  | 324 | 0.854679 |
| YCL064C_1778479_at     | -> Serine.10                    | 0.3493174   | 0.5960741  | 325 | 0.854679 |
| Arginine               | -> YHR018C_1772287_at.1         | 0.3358917   | 0.60286558 | 326 | 0.860738 |
| YJR148W_1777344_at.2   | -> Valine                       | 0.3336965   | 0.60399408 | 327 | 0.860738 |
| YMR250W_1774495_at     | -> Aspartic_acid.5              | 0.3144446   | 0.6141201  | 328 | 0.8725   |



|                              |                                |             |             |     |          |
|------------------------------|--------------------------------|-------------|-------------|-----|----------|
| YGR244C_1778290_at           | -> Succinic_acid.12            | 0.2919081   | 0.626532    | 329 | 0.88626  |
| Adenosine.5.monophosphate.7  | -> YAL054C_1772915_at          | 0.2871091   | 0.6292586   | 330 | 0.88626  |
| YKL104C_1778809_at.1         | -> Glutamine.11                | 0.2866683   | 0.62951057  | 331 | 0.88626  |
| Ribose.5.phosphate.11        | -> YER099C_1779140_at          | 0.2555108   | 0.64802085  | 332 | 0.901042 |
| Adenosine.5.monophosphate.12 | -> YDR226W_1775928_at          | 0.24976834  | 0.6515931   | 333 | 0.901042 |
| Asparagine                   | -> YGR124W_1769642_at.2        | 0.24812051  | 0.6526281   | 334 | 0.901042 |
| Ribose.5.phosphate.5         | -> YKL181W_1776342_at          | 0.2478254   | 0.6528139   | 335 | 0.901042 |
| Fumaric_acid.4               | -> YHR018C_1772287_at          | 0.244024    | 0.6552207   | 336 | 0.901042 |
| Succinic_acid.15             | -> YER065C_1779905_at          | 0.2439519   | 0.6552666   | 337 | 0.901042 |
| Lysine.1                     | -> YNL073W_1771061_at          | 0.2418979   | 0.6565774   | 338 | 0.901042 |
| Glyceric_acid                | -> YER073W_1771943_at          | 0.23943168  | 0.6581609   | 339 | 0.901042 |
| Fumaric_acid.2               | -> YKL148C_1772202_at.1        | 0.23856     | 0.6587232   | 340 | 0.901042 |
| YIL172C_1775391_s_at.1       | -> Glucose.5                   | 0.2267547   | 0.6664714   | 341 | 0.901042 |
| YOL061W_1770747_at.1         | -> Adenosine.5.monophosphate.1 | 0.2247974   | 0.6677809   | 342 | 0.901042 |
| Aspartic_acid.3              | -> YAR015W_1774134_at          | 0.2246762   | 0.6678623   | 343 | 0.901042 |
| YGL026C_1779478_at           | -> Serine.12                   | 0.2206841   | 0.670556854 | 344 | 0.901042 |
| YIL116W_1774739_at.1         | -> Phenylalanine.2             | 0.2191945   | 0.6715703   | 345 | 0.901042 |
| YKL181W_1776342_at           | -> Ribose.5.phosphate.5        | 0.2183243   | 0.6721643   | 346 | 0.901042 |
| Fumaric_acid.8               | -> YKL141W_1777334_at.1        | 0.2175774   | 0.6726754   | 347 | 0.901042 |
| YPR145W_1772615_at           | -> Aspartic_acid.2             | 0.2172769   | 0.67288137  | 348 | 0.901042 |
| YKL085W_1769857_at           | -> Malic_acid                  | 0.212289005 | 0.6763263   | 349 | 0.90306  |
| YER170W_1771081_at           | -> Adenosine.5.monophosphate.3 | 0.20653647  | 0.6803635   | 350 | 0.905855 |
| Glucose.1                    | -> YGL253W_1770167_at.1        | 0.2032089   | 0.6827312   | 351 | 0.906418 |
| Ribose.5.phosphate.6         | -> YKL127W_1777971_at          | 0.1982705   | 0.6862903   | 352 | 0.907252 |
| YKL106W_1776650_at           | -> Aspartic_acid.8             | 0.1946814   | 0.6889119   | 353 | 0.907252 |
| Malic_acid.4                 | -> YDL078C_1778808_at          | 0.1942892   | 0.6892002   | 354 | 0.907252 |
| YHR018C_1772287_at           | -> Fumaric_acid.4              | 0.1832689   | 0.6974526   | 355 | 0.91189  |
| YOL126C_1774081_at           | -> Malic_acid.2                | 0.18302013  | 0.6976424   | 356 | 0.91189  |
| YGR094W_1780055_at           | -> Valine.2                    | 0.1805869   | 0.6995071   | 357 | 0.91189  |
| YDR178W_1772220_at.1         | -> Fumaric_acid.3              | 0.17711694  | 0.7021931   | 358 | 0.91189  |
| YDR037W_1779238_at           | -> Lysine.2                    | 0.174218    | 0.7044618   | 359 | 0.91189  |
| YCR024C_1776019_at           | -> Asparagine.3                | 0.17421459  | 0.7044645   | 360 | 0.91189  |
| Ribose.5.phosphate.8         | -> YPR074C_1778503_at          | 0.1669348   | 0.7102652   | 361 | 0.911933 |

|                              |                                 |             |             |     |          |
|------------------------------|---------------------------------|-------------|-------------|-----|----------|
| YPR145W_1772615_at.1         | -> Glutamic_acid.7              | 0.1662446   | 0.710823007 | 362 | 0.911933 |
| Adenosine.5.monophosphate.18 | -> YLR359W_1777563_at.1         | 0.158132277 | 0.7174874   | 363 | 0.911933 |
| YHR020W_1774658_at           | -> Proline                      | 0.1580844   | 0.71752736  | 364 | 0.911933 |
| YIL172C_1775391_s_at         | -> Fructose.4                   | 0.1551342   | 0.72000234  | 365 | 0.911933 |
| YBL068W_1770750_at.1         | -> Adenosine.5.monophosphate.2  | 0.1536719   | 0.7212395   | 366 | 0.911933 |
| YER052C_1772562_at           | -> Aspartic_acid.1              | 0.1530976   | 0.7217274   | 367 | 0.911933 |
| YHL011C_1776097_at.1         | -> Adenosine.5.monophosphate.13 | 0.1522073   | 0.72248569  | 368 | 0.911933 |
| YGR124W_1769642_at.1         | -> Glutamic_acid                | 0.1507955   | 0.7236938   | 369 | 0.911933 |
| Adenosine.5.monophosphate.8  | -> YER005W_1775020_at           | 0.1503608   | 0.7240671   | 370 | 0.911933 |
| YOR374W_1776624_at           | -> Glyceric_acid.1              | 0.14636533  | 0.727529    | 371 | 0.912374 |
| YNR050C_1772003_at           | -> Glutamic_acid.4              | 0.1444017   | 0.729251    | 372 | 0.912374 |
| YIR034C_1770279_at           | -> Lysine                       | 0.1399197   | 0.7332338   | 373 | 0.912374 |
| Serine.6                     | -> YLR058C_1776401_at           | 0.139156458 | 0.7339196   | 374 | 0.912374 |
| YDR023W_1776877_at           | -> Serine.9                     | 0.1388374   | 0.73420689  | 375 | 0.912374 |
| YHR011W_1770696_at           | -> Serine.2                     | 0.1313602   | 0.7410542   | 376 | 0.918434 |
| YJL130C_1779682_at           | -> Glutamic_acid.36             | 0.1254812   | 0.7465996   | 377 | 0.922255 |
| Phenylalanine.4              | -> YNL316C_1777156_at           | 0.1232367   | 0.7487565   | 378 | 0.922255 |
| Glutamine                    | -> YGR124W_1769642_at.3         | 0.1197274   | 0.7521748   | 379 | 0.922255 |
| Fumaric_acid.6               | -> YJL045W_1774888_at.1         | 0.11745979  | 0.7544145   | 380 | 0.922255 |
| YDL246C_1777143_s_at         | -> Fructose.6                   | 0.1165653   | 0.7553048   | 381 | 0.922255 |
| YOR168W_1772939_at           | -> Glutamine.3                  | 0.113941    | 0.7579397   | 382 | 0.922255 |
| YLL018C_1776523_at           | -> Aspartic_acid.7              | 0.1083223   | 0.7637005   | 383 | 0.922255 |
| Aspartic_acid                | -> YGR124W_1769642_at           | 0.1072241   | 0.7648463   | 384 | 0.922255 |
| Fructose.3                   | -> YBR299W_1774491_s_at         | 0.105279    | 0.7668921   | 385 | 0.922255 |
| YLR382C_1773389_at           | -> Leucine                      | 0.1031223   | 0.7691857   | 386 | 0.922255 |
| YML022W_1771956_at           | -> Adenosine.5.monophosphate.6  | 0.1028238   | 0.7695053   | 387 | 0.922255 |
| Ribose.5.phosphate.4         | -> YHL011C_1776097_at           | 0.1007938   | 0.7716927   | 388 | 0.922255 |
| YIL078W_1774604_at           | -> Threonine.3                  | 0.09942242  | 0.77318464  | 389 | 0.922255 |
| Glycine.3                    | -> YDR232W_1775965_at           | 0.09923387  | 0.7733907   | 390 | 0.922255 |
| YPL262W_1770087_at           | -> Fumaric_acid                 | 0.09883864  | 0.7738233   | 391 | 0.922255 |
| Ribose.5.phosphate.3         | -> YBR111C_1771955_at           | 0.0958867   | 0.77708539  | 392 | 0.92378  |
| YOR241W_1778173_at           | -> Glutamic_acid.31             | 0.0881961   | 0.7858583   | 393 | 0.931101 |
| YKL106W_1776650_at.2         | -> Phenylalanine.3              | 0.0841721   | 0.79061924  | 394 | 0.931101 |

|                              |                                 |             |            |     |          |
|------------------------------|---------------------------------|-------------|------------|-----|----------|
| YDR226W_1775928_at           | -> Adenosine.5.monophosphate.12 | 0.08311485  | 0.791891   | 395 | 0.931101 |
| YHR208W_1779000_at           | -> Leucine.3                    | 0.08310924  | 0.7918978  | 396 | 0.931101 |
| Glutamic_acid.1              | -> YLR089C_1769691_at.1         | 0.07962839  | 0.7961494  | 397 | 0.931101 |
| Adenosine.5.monophosphate.15 | -> YGL067W_1776299_at           | 0.07881442  | 0.7971584  | 398 | 0.931101 |
| YGR124W_1769642_at           | -> Aspartic_acid                | 0.0769035   | 0.7995498  | 399 | 0.931101 |
| YEL046C_1772625_at           | -> Glycine.1                    | 0.07570425  | 0.8010674  | 400 | 0.931101 |
| Fumaric_acid.3               | -> YDR178W_1772220_at.1         | 0.07502605  | 0.8019314  | 401 | 0.931101 |
| YPL160W_1776027_at           | -> Leucine.1                    | 0.0740174   | 0.8032245  | 402 | 0.931101 |
| Succinic_acid                | -> YLL058W_1770340_at           | 0.07033294  | 0.8080316  | 403 | 0.933882 |
| Malic_acid.2                 | -> YOL126C_1774081_at           | 0.06912924  | 0.8096318  | 404 | 0.933882 |
| Glutamic_acid                | -> YGR124W_1769642_at.1         | 0.066669    | 0.8129503  | 405 | 0.935338 |
| YER086W_1776603_at.1         | -> Threonine.4                  | 0.06459742  | 0.81579657 | 406 | 0.935338 |
| Ribose.5.phosphate.1         | -> YOL061W_1770747_at           | 0.06379253  | 0.8169158  | 407 | 0.935338 |
| YMR113W_1775174_at           | -> Glutamic_acid.19             | 0.06104695  | 0.82079225 | 408 | 0.936211 |
| Ribose.5.phosphate.7         | -> YBR117C_1778142_at           | 0.060416589 | 0.8216955  | 409 | 0.936211 |
| Glutamic_acid.28             | -> YJL101C_1777080_at           | 0.0567422   | 0.8270644  | 410 | 0.938385 |
| YLR164W_1779688_at           | -> Succinic_acid.14             | 0.05636114  | 0.8276318  | 411 | 0.938385 |
| YJL071W_1773952_at           | -> Glutamic_acid.12             | 0.05282192  | 0.8330029  | 412 | 0.942183 |
| Succinic_acid.13             | -> YJR051W_1778330_at           | 0.05149561  | 0.8350651  | 413 | 0.942228 |
| YKL106W_1776650_at.1         | -> Glutamic_acid.26             | 0.04711129  | 0.84209157 | 414 | 0.947862 |
| YJR148W_1777344_at           | -> Leucine.2                    | 0.04435335  | 0.846691   | 415 | 0.950742 |
| Asparagine.3                 | -> YCR024C_1776019_at           | 0.04097788  | 0.8525313  | 416 | 0.95361  |
| Glyceric_acid.1              | -> YOR374W_1776624_at           | 0.04049803  | 0.8533819  | 417 | 0.95361  |
| YOL064C_1771215_at           | -> Adenosine.5.monophosphate.4  | 0.03925697  | 0.85560671 | 418 | 0.95361  |
| YPL061W_1778325_at           | -> Glyceric_acid.2              | 0.03824292  | 0.8574522  | 419 | 0.95361  |
| Glucose.4                    | -> YBR299W_1774491_s_at.1       | 0.03697969  | 0.8597874  | 420 | 0.95361  |
| YDL171C_1776998_at           | -> Glutamic_acid.27             | 0.03605537  | 0.8615228  | 421 | 0.95361  |
| Phenylalanine.5              | -> YLR060W_1777242_at           | 0.03388805  | 0.8656855  | 422 | 0.955947 |
| Fumaric_acid                 | -> YPL262W_1770087_at           | 0.03240332  | 0.868618   | 423 | 0.956917 |
| YGR124W_1769642_at.2         | -> Asparagine                   | 0.02885362  | 0.8759262  | 424 | 0.960301 |
| Glyceric_acid.2              | -> YPL061W_1778325_at           | 0.02841668  | 0.8768574  | 425 | 0.960301 |
| YKL104C_1778809_at           | -> Glutamic_acid.33             | 0.02794469  | 0.8778717  | 426 | 0.960301 |
| YOR142W_1778018_at           | -> Succinic_acid.11             | 0.02655627  | 0.8809079  | 427 | 0.961366 |

|                             |                                 |             |             |     |          |
|-----------------------------|---------------------------------|-------------|-------------|-----|----------|
| YLR060W_1777242_at          | -> Phenylalanine.5              | 0.0222392   | 0.8909133   | 428 | 0.970013 |
| YJL045W_1774888_at.1        | -> Fumaric_acid.6               | 0.01924882  | 0.8984452   | 429 | 0.974083 |
| YDR321W_1775295_at          | -> Aspartic_acid.6              | 0.01894379  | 0.89924625  | 430 | 0.974083 |
| YOL033W_1775445_at          | -> Glutamic_acid.20             | 0.01830709  | 0.90094     | 431 | 0.974083 |
| Adenosine.5.monophosphate.3 | -> YER170W_1771081_at           | 0.01754321  | 0.9030123   | 432 | 0.974083 |
| Alanine                     | -> YLR089C_1769691_at           | 0.016428629 | 0.9061208   | 433 | 0.975179 |
| Succinic_acid.7             | -> YJR130C_1775462_at           | 0.01530282  | 0.909372    | 434 | 0.976422 |
| YER073W_1771943_at          | -> Glyceric_acid                | 0.01434728  | 0.9122285   | 435 | 0.976572 |
| YJL216C_1778617_at          | -> Fructose.7                   | 0.01386637  | 0.9137029   | 436 | 0.976572 |
| YPL262W_1770087_at.1        | -> Malic_acid.1                 | 0.01221801  | 0.9189649   | 437 | 0.979949 |
| YBR184W_1775738_at          | -> Glucose.6                    | 0.01157971  | 0.92109886  | 438 | 0.979982 |
| Isoleucine                  | -> YPL040C_1776686_at           | 0.01085404  | 0.9235989   | 439 | 0.98025  |
| YHR091C_1774813_at          | -> Arginine.2                   | 0.009333293 | 0.9291291   | 440 | 0.98025  |
| Ribose.5.phosphate.10       | -> YOR095C_1779097_at           | 0.008950076 | 0.9305934   | 441 | 0.98025  |
| YFL030W_1770767_at.1        | -> Alanine.1                    | 0.008877838 | 0.93087299  | 442 | 0.98025  |
| YER086W_1776603_at          | -> Serine.7                     | 0.008594837 | 0.93197945  | 443 | 0.98025  |
| YOR360C_1778594_at          | -> Adenosine.5.monophosphate.20 | 7.48E-03    | 0.9365234   | 444 | 0.98025  |
| YJR139C_1769510_at.1        | -> Homoserine                   | 0.007223758 | 0.9376215   | 445 | 0.98025  |
| YBR117C_1778142_at          | -> Ribose.5.phosphate.7         | 0.006993506 | 0.9386206   | 446 | 0.98025  |
| YHR037W_1773117_at          | -> Glutamic_acid.8              | 0.006618863 | 0.940282283 | 447 | 0.98025  |
| Malic_acid                  | -> YKL085W_1769857_at           | 0.005187575 | 0.9471151   | 448 | 0.982828 |
| YGR019W_1774010_at          | -> Glutamic_acid.13             | 0.005059001 | 0.9477731   | 449 | 0.982828 |
| Arginine.3                  | -> YPL111W_1778654_at           | 0.004807877 | 0.94908303  | 450 | 0.982828 |
| YLR058C_1776401_at          | -> Serine.6                     | 0.004221994 | 0.9522799   | 451 | 0.983952 |
| YLR359W_1777563_at.1        | -> Adenosine.5.monophosphate.18 | 0.003434766 | 0.9569506   | 452 | 0.985509 |
| YMR118C_1773702_at.1        | -> Fumaric_acid.5               | 0.003252608 | 0.958106    | 453 | 0.985509 |
| YDR399W_1776262_at          | -> Adenosine.5.monophosphate.14 | 0.002945312 | 0.9601314   | 454 | 0.985509 |
| YKL029C_1776811_at          | -> Malic_acid.3                 | 0.002165172 | 0.965811    | 455 | 0.985928 |
| YGL205W_1776791_at          | -> Citric_acid.1                | 0.002089205 | 0.9664155   | 456 | 0.985928 |
| YFL030W_1770767_at          | -> Glycine                      | 0.001747162 | 0.9692852   | 457 | 0.985928 |
| YLR089C_1769691_at.1        | -> Glutamic_acid.1              | 0.001562182 | 0.9709555   | 458 | 0.985928 |
| YOR303W_1773884_at          | -> Glutamic_acid.11             | 0.001383299 | 0.9726678   | 459 | 0.985928 |
| YOL049W_1778316_at          | -> Glycine.6                    | 0.001326617 | 0.9732333   | 460 | 0.985928 |

|                    |                                 |             |             |     |          |
|--------------------|---------------------------------|-------------|-------------|-----|----------|
| YCL004W_1779004_at | -> Serine.11                    | 0.000778235 | 0.9794964   | 461 | 0.988039 |
| YLR027C_1774241_at | -> Aspartic_acid.4              | 0.000773598 | 0.9795576   | 462 | 0.988039 |
| YLR089C_1769691_at | -> Alanine                      | 0.000242149 | 0.9885616   | 463 | 0.9931   |
| YBR115C_1775044_at | -> Adenosine.5.monophosphate.9  | 2.31E-04    | 0.988838088 | 464 | 0.9931   |
| YGL248W_1777854_at | -> Adenosine.5.monophosphate.19 | 7.56E-05    | 0.9936065   | 465 | 0.995743 |
| YDL141W_1779304_at | -> Adenosine.5.monophosphate.22 | 9.64E-06    | 0.99771734  | 466 | 0.997717 |
